# Supplementary material
Source: Research Square preprint supplement (doi:10.21203/rs.3.rs-9461196/v1)
Supplement: Supplementary file 1 [file 5aa0df56ce3bf1ad8f5f290b.xlsx]

## Sheet: Sheet1
PU1	PU2	PU3	PEOU1	PEOU2	PEOU3	SC1	SC2	SC3	TA1	TA2	TA3	AD1	AD2	AD3
4.29803	4.91338	3.5788	4.52653	3.32647	4.52687	4.81686	4.50686	4.06241	2.48593	1.45625	1.86631	3.94577	3.98297	3.85808
3.91704	4.34806	3.60226	3.56186	3.4495	2.73646	4.63679	3.99666	4.24474	1.96016	2.30262	1.86775	4.26653	4.16226	3.21307
4.38861	5	3.15844	4.00276	4.6106	1.81749	3.27628	4.70711	4.1507	1.25822	2.95175	2.12447	3.54014	3.93127	4.11284
4.91382	3.63573	5	5	4.1629	3.48419	4.31089	3.17596	4.5788	2.01977	1.97648	2.6677	3.50184	4.59489	3.48929
3.85951	3.35321	3.25368	4.52779	4.33089	4.18622	2.91306	4.31194	4.65411	2.06795	1.60122	1.48149	4.51292	3.96283	4.3992
3.85952	3.03277	3.58426	3.71203	4.20435	4.64018	4.12816	5	3.46963	2.57494	2.64854	2.12202	3.83384	5	5
4.94753	4.99763	3.56896	3.27617	4.23442	3.47579	5	4.25182	4.62126	2.2584	3.20378	2.37097	3.58771	5	3.52806
4.46046	4.49262	4.53695	2.39373	3.20412	3.512	3.53126	4.16595	3.3882	2.98155	1.41352	1.63067	3.71409	3.66507	4.19942
3.71832	4.06665	3.82303	3.39659	4.62839	4.60773	3.59941	4.00513	4.45271	2.07091	3.17416	3.65767	4.51937	4.24182	2.9467
4.32554	4.26798	4.74865	3.75221	4.70175	2.49118	4.55842	3.05747	4.47184	2.46007	3.17211	1.80255	3.72258	3.80961	4.27234
3.72195	3.42471	3.59591	3.20897	3.86237	3.52804	3.17432	4.81334	2.95321	3.32879	3.26786	1.93139	4.02941	4.00401	3.46857
3.72056	5	4.1674	3.80812	3.97391	3.9333	3.72035	3.63349	4.15579	2.73928	3.45294	1.71518	4.10902	5	3.6251
4.14518	4.17753	3.49879	3.9538	3.08134	4.11445	4.45786	4.30269	3.8189	2.45797	4.14141	3.65894	2.94959	4.01546	3.33923
2.85203	4.16564	5	3.7426	4.30855	3.44314	3.71943	3.06218	3.64474	2.07864	2.35074	2.78703	3.21732	4.41614	4.43929
2.96505	4.53546	3.28744	3.445	4.34323	3.82411	3.95842	3.29232	4.91051	2.05674	2.6767	1.74439	4.30177	4.52479	4.60438
3.66263	4.38861	4.18589	4.01806	3.96269	2.05817	4.54651	4.86105	3.70779	1.90457	2.30849	3.17436	3.65778	3.59962	4.01403
3.3923	4.23433	4.38027	4.20936	4.67461	3.33923	4.35293	3.79162	3.61617	2.1213	2.60138	2.54049	4.73403	3.68694	3.48134
4.18855	3.62572	4.24828	3.13672	3.79955	4.11746	4.26009	4.87197	4.14542	3.02897	3.67301	2.58008	4.68008	3.47639	4.95371
3.45519	4.38288	3.88883	4.88765	4.33876	3.11239	3.89653	3.95306	4.51135	2.34468	1.65849	2.15887	4.5315	3.66842	3.54975
3.15262	5	3.92211	3.83099	3.3882	3.84129	4.32204	2.89486	4.01501	1.55516	1.99727	1.87541	5	2.48998	2.70278
4.87939	4.90725	4.02629	3.91319	3.98587	4.11281	4.02576	4.53524	4.79982	3.73772	3.56403	2.63644	4.05015	4.52675	4.27503
3.86453	5	3.9118	4.39575	3.89539	3.56022	4.37468	3.64606	4.41859	2.72398	3.31403	2.01844	4.48933	5	3.33714
4.04052	3.79327	4.57833	4.06325	4.13518	3.91932	3.80184	4.41921	2.79307	1.51514	2.34581	3.67173	3.74936	4.28869	4.59317
3.14515	3.50624	5	4.5672	3.77828	3.12609	3.99046	4.01513	3.78232	2.19071	3.19808	1.5115	5	3.35024	3.77132
3.67337	4.02453	3.6655	4.10099	3.92112	3.65537	3.50603	3.07413	3.76289	2.57762	2.83885	3.47531	5	3.81433	4.36223
4.06655	4.13343	3.17812	3.47129	4.49563	4.22715	4.079	4.09858	4.38762	3.69321	3.65019	2.32208	4.10713	3.92467	4.8409
3.3094	4.75651	3.94703	4.15305	3.73794	3.90988	3.6134	5	2.52511	1.72432	2.65216	2.60936	4.33195	3.58945	3.27468
4.22542	3.08452	5	3.09939	3.03605	3.38943	3.43157	4.29579	5	3.18323	3.31794	2.98321	4.91558	4.71611	3.66044
3.63962	5	3.5178	3.97599	5	3.95695	4.2552	3.96549	4.41862	3.47964	4.44941	1.95883	4.01172	4.68616	3.9546
3.82498	4.0052	4.98347	3.87674	4.82887	4.30023	4.22764	4.64521	4.18933	2.05994	3.01867	3.00497	3.70603	3.50673	4.92253
3.63898	3.84387	5	3.75432	3.22464	2.36504	4.56972	4.1264	4.80894	2.30574	2.63453	1	4.62439	4.63505	3.60497
5	3.49274	3.66785	3.81002	4.41382	4.61135	3.84132	4.12572	5	1.77458	3.10571	1.89601	4.14706	5	3.6433
3.9919	3.10709	4.34139	2.58271	3.69822	3.56462	4.34483	3.34502	4.62245	2.35758	2.3443	1.75316	4.2098	5	4.28688
3.36537	4.5939	4.97704	3.51589	4.15809	4.09784	4.43048	4.14031	4.66929	2.47439	4.27158	1.52255	3.59944	5	3.65366
4.49353	4.14399	3.77252	3.96499	4.17653	4.63807	4.36686	4.62127	4.17841	2.96175	2.72605	2.24953	3.0694	3.6588	4.09152
3.26749	3.32602	3.87785	4.0119	3.85936	2.83983	3.60461	3.49836	4.01508	3.26313	2.40895	2.67002	4.24169	5	3.06908
4.12532	3.32295	3.65099	3.18063	3.52974	3.30339	4.18962	4.8547	3.81452	1.97633	2.01502	2.89186	4.64298	3.98748	5
2.8242	3.89853	3.39115	4.786	3.58568	3.59802	4.31848	3.94498	3.60433	1.12287	3.36805	2.56861	3.96452	3.84452	3.19137
3.20309	5	3.61043	3.29368	3.45028	3.25137	4.10431	3.46734	3.68779	2.48513	3.20703	1.93401	4.96186	4.39624	3.80695
4.11812	3.94425	3.26564	4.57862	3.50091	5	2.84811	4.59858	3.28967	2.70548	2.25185	2.65831	3.67765	3.85076	3.98051
4.44308	3.19811	4.02045	4.19904	3.95969	3.20026	4.19629	3.82792	4.05448	2.67459	3.00352	2.487	3.46718	4.43943	5
4.10282	3.95255	3.53802	3.44764	3.57054	3.41112	5	4.45571	3.0892	2.27133	1.54401	3.05524	4.05966	3.40795	3.20509
3.93061	3.93637	4.14027	5	4.40923	3.94307	3.88398	3.82494	4.21455	2.58733	2.72948	2.94386	4.05044	4.05675	5
3.81934	2.48187	3.06646	3.06445	4.89235	2.9585	3.66315	3.9641	4.0782	3.56081	2.91693	2.42133	4.56198	4.97135	4.45431
3.11289	4.06742	4.19853	4.54341	3.65197	3.52302	4.32401	4.29614	4.18816	2.76721	3.79513	1.77192	3.63502	4.16576	4.25026
3.56809	3.96144	4.50012	4.60041	4.14364	4.02222	4.28743	4.17454	3.78672	2.23864	2.06043	1.94293	4.92086	4.28496	3.40922
3.72362	4.51772	2.80376	3.43057	4.29981	3.567	4.81564	2.80268	5	2.14986	1.70515	2.01515	5	4.48516	4.34268
4.63427	5	4.22443	4.87473	4.2832	3.73463	3.34528	3.32725	4.91607	2.3811	1.9732	2.17931	4.07651	4.9024	3.56591
4.20617	4.77594	4.7366	3.72497	4.04557	3.42947	4.53883	4.55765	3.35327	3.64572	1.6644	2.58764	4.84983	3.20687	4.76
2.94218	3.93867	3.27422	4.10209	4.44561	2.73987	4.45425	3.92072	4.23972	2.37169	3.53566	2.90062	3.4661	4.55071	3.41736
4.19445	3.43608	5	4.08223	4.28935	4.02512	4.01471	3.68576	3.7352	2.48614	3.68405	2.36422	4.74513	4.03912	3.9321
3.76895	5	4.25141	3.80598	3.2574	5	4.30321	3.18486	3.49131	2.16238	2.82415	2.41129	4.72837	4.29998	3.66684
3.59385	4.13553	3.57699	4.46757	4.52149	3.81288	4.71767	3.35216	3.29596	3.26929	3.45491	2.50031	4.61806	4.83597	3.40749
4.36701	4.10836	3.96654	4.45544	4.53237	3.95768	4.62339	2.78692	4.35933	3.87189	2.69377	2.03887	4.09066	3.48349	4.44479
4.6186	4.08552	4.335	2.67603	3.54203	4.28491	3.41419	3.93923	3.69117	2.81543	2.53342	1.75223	2.32745	3.59241	4.32128
4.55877	4.21885	4.0456	4.81304	4.02276	2.91147	4.59209	3.64094	4.6807	2.55794	2.36687	1.17119	3.71496	3.03874	4.72541
3.49647	4.01338	4.32325	2.73626	4.41	4.99176	4.06119	3.42005	4.69627	2.52575	2.38273	1.9134	3.72445	3.8705	2.93207
3.81447	3.7558	3.4476	4.62278	3.87441	3.94163	4.14372	3.95913	4.92435	1	1.51654	2.7312	3.51305	4.99826	4.6385
4.19876	3.77188	4.10162	4.68869	4.64379	4.9423	4.14392	4.21838	3.58857	3.02161	2.78498	1.90796	4.17335	4.12765	5
4.58533	4.08035	3.15177	3.13632	5	3.28688	4.00985	5	4.38522	2.59392	2.57177	2.23354	3.84862	3.39593	3.72902
3.7125	3.77395	3.93326	3.61243	3.52841	5	4.81502	3.09287	4.47947	2.79984	3.12175	2.7265	3.60523	3.90859	5
3.8886	3.67229	3.45766	3.12601	3.17137	4.34261	4.04977	4.69563	3.81549	2.00198	2.66547	2.76448	3.46472	3.30728	3.8421
3.3362	4.16386	3.55868	3.74956	4.18229	4.18713	3.42827	4.58386	3.63694	2.23088	2.48611	1.64433	3.67069	3.52489	3.17655
3.28228	3.94701	4.74166	3.68438	4.43294	3.96382	3.86388	3.53254	5	2.21228	1.99016	3.09794	4.7729	4.43329	3.81662
4.48752	5	4.65479	4.44576	3.86148	3.62603	4.20722	4.12194	4.2365	3.21514	2.65051	3.18915	3.70338	3.49568	4.62892
4.81374	2.50942	4.36548	4.81722	4.87196	4.64037	4.83753	3.72542	4.48158	2.23487	3.11677	1.60911	3.79104	4.86758	3.49709
3.95679	4.7549	3.34461	4.87698	3.19684	3.89825	4.46186	4.11141	3.60675	3.95786	1.79966	1.82331	3.82598	4.15733	3.6398
4.60212	4.84765	3.81015	3.50648	4.41575	2.42305	3.58968	4.90548	3.36843	2.8016	2.66123	3.23376	4.3034	4.25136	4.35612
4.21698	2.85597	4.72786	3.75354	3.63648	3.01797	5	4.36336	3.75833	1.60702	2.76313	2.2972	4.37375	4.03298	4.00184
3.61293	3.89439	4.08503	2.72159	5	3.66991	4.25887	4.30517	4.02559	2.41002	2.09735	1	2.27321	4.66371	4.35077
4.21684	3.87714	5	3.33589	5	4.017	4.86523	3.74181	3.46147	2.04383	2.1885	1.42022	4.71298	4.6699	4.1427
4.92282	3.25549	4.23599	4.5754	3.54001	3.76039	4.00897	3.10957	4.09409	1	2.76143	2.22544	4.96182	4.40103	4.28778
3.9785	3.63331	4.11523	5	3.67027	4.65328	4.42002	3.87492	3.0869	3.61963	1.80661	1.58587	3.46989	4.53887	3.74062
4.93879	3.43365	3.81453	3.03596	4.51575	2.43423	4.60368	4.72396	3.42797	2.9922	2.84495	2.1106	3.51662	4.07275	4.13904
2.42815	5	4.08012	3.48528	3.76772	3.90051	4.83092	3.0837	4.50255	2.87325	1.97325	2.42268	3.82985	4.52532	3.44358
4.49314	4.66141	3.90852	3.88152	3.97275	2.52741	4.73442	3.36695	4.46227	2.61578	3.344	3.42358	3.6464	3.99727	4.77306
4.05223	4.86293	4.42487	4.09611	4.01523	4.3318	4.62332	4.07576	3.86487	1.53259	4.23648	2.19668	4.23436	4.20134	3.61944
3.8206	4.533	4.57402	3.33328	2.8482	3.73388	3.91095	3.40921	3.48934	2.16147	1.99747	3.15078	2.93208	4.03521	4.67731
4.05506	3.42257	3.52841	4.19684	3.9917	4.09373	3.75695	3.52449	3.48356	3.08925	2.97395	3.40013	3.42924	3.92567	3.85984
2.80746	3.78529	3.20126	3.56831	3.58616	3.19528	4.29956	3.74584	3.87604	1.76415	2.09128	3.40402	5	3.78653	4.1212
3.8682	4.39362	2.89828	3.88988	3.70413	4.69563	4.65988	3.18063	4.48671	1	3.32867	2.59933	3.54307	4.48061	3.70302
4.21427	3.36672	4.30479	4.2824	4.86618	4.52921	3.96637	3.41553	4.65695	2.34103	1.71432	1.0257	4.84606	4.98636	3.3904
4.88674	4.5278	3.33798	3.9045	3.2461	4.20848	4.7391	4.42206	3.80208	2.40077	2.93641	2.72258	4.3132	4.90266	2.95314
3.68904	3.9558	2.70827	3.59453	4.48792	3.70934	4.97157	3.21558	3.4079	2.59489	1.98891	3.13388	3.01444	3.44606	3.36681
3.5149	3.87511	4.23315	3.82327	3.83262	4.2059	3.55021	3.04128	4.26071	3.00996	2.45511	2.34325	4.4812	4.97352	3.80565
3.69895	4.52658	5	3.83815	3.83214	3.30518	3.59785	3.62199	3.60588	2.94632	1.87828	3.62121	4.0294	4.0091	4.12713
4.54924	4.36656	3.99636	3.64099	4.47422	4.39889	4.01577	4.43917	3.78905	2.68114	3.17565	3.00188	3.82672	4.56044	4.60623
4.19725	3.88342	4.50309	3.71884	4.20403	4.95464	4.28457	3.88185	4.89517	3.33687	2.01411	2.79779	4.24697	3.65627	3.73255
3.68214	4.7956	4.0491	5	4.34237	4.54943	3.78526	3.72125	4.59627	1.43672	2.98637	3.16047	4.38478	4.28519	3.47082
4.30796	3.45136	3.94067	4.29264	4.58091	3.28928	4.91132	4.02662	4.19478	2.85321	2.35913	2.63336	4.52456	4.38823	3.13437
4.05825	4.46956	4.55145	3.69316	3.80121	4.05299	4.35444	2.95258	3.33685	2.93858	2.51987	1	4.80695	3.30924	4.28804
4.58119	4.45586	3.82584	4.38787	3.63266	2.8948	4.12367	4.29682	4.22684	1.63231	2.70343	2.0506	4.34488	4.56496	4.82992
3.57877	3.91427	4.16044	3.66633	3.34891	4.20067	3.23845	4.23006	4.73759	1.44799	2.06672	3.23802	3.27462	5	4.7598
3.8034	4.29568	4.19302	4.72119	3.50475	4.11542	3.31051	3.75441	3.87462	1.97784	2.74726	1.83469	3.81581	4.09521	4.42596
3.76474	3.34933	3.59915	4.15875	5	2.49113	4.26861	4.60355	4.91067	2.03692	3.67123	2.24357	5	5	4.38313
3.12189	4.65442	4.59523	3.82489	4.74681	2.98675	2.82044	3.3235	4.87565	3.02739	2.05533	1.66861	4.53469	4.08618	5
4.17767	3.98906	3.89502	4.2134	3.18936	3.6018	4.70758	4.67675	5	2.06982	3.42027	3.64875	5	4.70975	4.19925
4.15663	3.78637	3.54655	2.80039	3.20653	3.5894	4.00511	4.0927	4.28315	1.90056	3.64867	3.57704	4.93726	2.86886	4.38768
4.00307	4.72941	4.32191	3.11126	4.28912	2.95337	5	3.79807	4.45244	2.07186	2.02869	1.78129	4.24508	5	3.80753
3.85925	3.67739	3.46092	3.06425	4.32836	4.07229	5	3.98808	4.94851	3.28304	1.58146	2.50311	4.28084	5	3.18277
3.15078	3.25492	4.01691	4.00006	4.32933	3.97603	3.99113	3.93564	4.36844	2.50913	2.81137	1.92365	4.07805	4.02922	3.58969
3.74761	3.16602	3.99453	5	3.84703	3.66401	4.0362	4.73217	3.79926	2.37452	2.21681	2.83046	3.05732	3.01675	3.9945
3.79437	4.46361	4.65154	5	3.92473	3.27095	4.69735	3.35399	3.83087	2.423	3.90802	2.75678	4.11083	4.37282	4.03647
3.51863	3.33174	4.28482	4.34664	4.19673	4.53409	5	3.54249	4.24313	3.40444	2.62437	2.96819	4.8264	3.33364	5
3.90323	5	3.98498	4.25059	4.05154	4.95878	3.11718	4.62178	3.32566	1.97558	2.03846	2.63234	3.74022	4.46691	4.04877
4.24243	2.85084	4.49066	2.63926	2.66842	3.46151	3.02817	3.64268	4.01404	3.42086	1.79699	4.45478	4.34717	4.44694	4.70731
5	5	4.83412	3.52013	3.86212	3.37148	3.72678	4.54032	4.75793	2.64735	3.36293	1.68045	4.61095	3.63516	3.73895
4.10475	4.22661	4.33469	3.34855	3.48916	4.14385	4.44964	5	2.78525	2.38771	2.20017	1.20258	3.55419	4.87258	3.81299
4.15453	4.04197	4.00621	3.46541	4.10513	3.54938	4.39812	3.75892	5	4.25063	2.63068	2.12484	3.82922	4.68334	3.2026
3.95533	3.77305	3.2129	3.7823	5	3.70242	4.74186	4.40882	4.77342	1.76105	3.26906	1.30241	3.48925	4.78549	3.5546
2.84874	4.33948	3.36093	3.56954	4.22049	4.31776	3.38018	3.30778	3.82414	2.25242	2.26102	1.35528	3.6067	4.20531	4.31619
3.98409	4.07742	3.81687	2.51449	3.81188	2.46345	2.71031	4.45284	4.42603	1.6373	2.56785	1.69908	3.32744	3.35069	4.00454
4.03614	4.76198	3.63429	4.42354	4.55308	4.72281	4.61481	4.11965	4.10189	3.16672	2.5884	1.75447	3.55973	4.78672	4.56576
5	4.16854	3.88782	3.14908	4.28961	3.85088	3.60308	4.28382	4.83799	3.68243	3.07833	1.73177	4.95167	4.03778	4.10875
3.88458	4.19018	4.03399	4.06747	4.25206	3.51195	2.88891	3.61266	4.68961	3.66895	3.01352	2.76275	3.55071	3.36613	3.78853
4.18093	3.88183	4.31782	5	4.36411	3.73754	4.18704	3.00335	3.25996	3.35676	2.44592	2.04567	4.17588	5	5
3.97917	4.06583	3.9577	3.25643	5	3.7737	4.57591	4.30195	4.45236	2.36167	2.64455	2.27434	3.79828	5	3.94366
3.29879	4.28468	4.2919	2.1288	3.32147	2.58816	4.02677	2.76196	3.97662	2.24433	2.33975	3.02596	4.80732	4.17525	4.6978
4.68569	3.0739	4.03868	3.6998	4.28418	4.84646	3.82529	3.80959	4.1497	1.33018	1.56567	1.86357	4.8867	5	3.75927
4.45116	3.29109	2.81472	4.67067	3.44417	3.82893	4.00438	4.56471	3.6631	3.92511	2.78032	2.21482	4.61844	4.25479	4.42576
4.47462	4.54596	3.4364	5	4.33331	4.1101	3.87765	4.11514	5	2.82828	3.92453	2.65603	4.28368	3.97173	4.55681
3.45437	4.20252	3.91355	3.03932	3.44879	4.46608	3.29117	5	4.72404	2.15563	1.9814	1.0409	3.96136	3.82172	4.1251
4.84168	3.98961	3.27418	4.24769	3.74958	3.08519	3.67119	4.61507	3.65614	3.42964	2.05888	1	3.38488	5	2.58731
3.15889	4.11106	4.35996	3.57428	3.82295	4.13143	4.41277	3.60766	3.29923	1.81906	1.99049	2.64228	5	3.73191	4.01095
4.35211	4.30855	4.91845	3.82584	4.58549	3.61265	4.29301	4.01639	3.8686	2.78464	3.10721	2.74441	3.6442	4.64116	4.73828
5	3.77614	4.73126	5	4.55107	4.39274	4.20084	3.97158	4.3607	2.37916	2.91394	3.84495	4.49819	3.8645	4.31649
3.40568	3.63302	3.87193	2.84792	3.25257	2.31094	3.50291	3.05069	4.24412	2.94707	2.48902	2.51067	4.73574	3.92382	4.2675
3.66022	4.21751	4.89444	4.07762	4.03296	3.73063	3.9911	3.43576	4.85188	2.4555	1.95739	2.97382	3.76683	4.81815	2.96665
4.05979	3.51298	4.0892	4.22739	3.57425	3.37803	2.79376	3.66354	4.57395	1.48435	2.66466	2.26317	4.72281	3.97198	3.56773
3.69791	4.34495	3.79775	4.66005	3.2449	4.10258	4.20709	2.77827	4.68174	2.5529	1.50476	2.60806	4.55853	3.95712	4.24681
3.0696	3.07845	3.63196	3.96859	3.86979	4.12903	4.95731	4.0285	4.29611	3.2342	2.7004	3.56708	5	4.87968	4.24623
4.04114	4.71749	3.81852	4.11564	3.81491	3.30466	3.21552	3.85056	3.26642	2.47955	3.21007	1	3.81839	5	4.7288
3.36262	4.38356	3.76709	3.62585	5	3.30148	3.74844	2.99626	3.98258	3.04258	1.72416	2.68953	3.32848	4.58681	3.91308
4.28416	4.25362	4.10225	4.08839	4.25978	3.72253	4.29746	4.24253	4.73605	1.76813	1.52724	3.89491	3.79671	3.80714	4.24349
3.44835	4.68961	4.09634	3.65977	3.17343	3.17235	4.85171	4.42952	4.06909	2.48162	3.70561	2.59742	4.22531	3.89363	4.00982
4.92996	5	4.00183	4.3351	3.66114	4.38939	3.83107	4.13622	4.40185	2.06284	2.17177	3.5554	4.13493	4.24795	3.40783
3.53005	4.70862	4.26216	3.64127	4.61283	3.54155	3.68465	3.80556	3.90875	3.02289	3.39516	1.95955	3.86394	4.39256	2.64653
3.80676	2.99548	4.71439	4.16397	5	1.76511	2.91865	4.35487	3.48211	2.52204	2.4922	2.37757	2.95448	3.60728	4.25861
4.48811	3.33225	4.56973	3.87952	3.04841	3.53762	4.16206	4.40813	4.02599	2.98305	2.48663	2.42347	4.38229	4.63382	4.10437
3.26148	3.72511	3.10906	4.68824	2.87205	3.07302	5	4.18444	4.28543	3.2614	2.90689	1	5	4.25131	3.62909
4.13648	4.11565	2.46765	3.86402	5	2.65811	4.26642	3.50523	3.70659	2.98413	1.9812	1.58228	4.37855	3.17058	3.0285
4.78429	4.4106	4.56059	2.65888	4.23377	2.9338	4.08663	4.16596	3.95857	2.69118	2.69275	1.63219	4.46548	3.64264	4.37784
3.03551	3.66455	3.17987	4.78335	3.47902	3.87659	4.29325	4.71729	3.53632	1.80125	2.33296	2.97545	4.44347	3.89752	3.84045
4.11078	4.21206	3.86514	3.26599	4.32078	4.73005	4.09334	3.64202	4.77155	2.49805	1.67565	3.01051	4.33823	4.15629	4.33412
4.15593	3.64677	3.29793	3.44236	2.41855	4.01923	3.61219	5	3.92333	2.12684	2.83624	2.62683	4.659	5	5
4.46909	3.73309	2.91881	3.48304	4.00203	3.37545	4.59397	3.68462	4.97165	2.25916	2.41568	2.97687	4.33722	4.3429	2.71514
3.25783	3.256	4.32488	4.86211	4.19669	4.11913	4.23546	4.01944	5	2.23783	2.49008	2.2851	3.91239	3.69554	3.58024
3.20773	3.54606	4.45549	2.40503	4.55456	3.47864	4.11057	3.59651	4.05137	1.81405	1.75289	3.24135	3.62241	4.33238	3.87437
4.31316	3.28899	3.65409	5	3.39166	3.31378	3.51478	4.13396	3.49493	1.12986	3.71398	2.40615	3.95062	3.98875	4.8729
4.17819	3.51448	2.44537	4.63924	4.05141	2.99195	4.8821	2.95467	2.84846	2.0323	3.2137	2.4405	4.28848	4.39485	3.01816
4.1503	4.73219	3.67225	4.05627	3.44475	2.57372	4.49882	3.67237	3.21678	2.63537	3.27491	2.21409	3.91035	4.54834	5
4.20787	3.53036	4.23508	3.86157	4.15323	3.52705	3.76825	3.34473	3.2757	1.55628	2.38619	2.87912	4.2886	4.92554	4.08151
3.59199	5	3.11265	4.09989	3.46279	3.91064	4.70109	4.0812	4.92708	2.51098	1.38957	2.10516	4.36349	4.18543	3.9424
4.13935	4.39599	4.11002	4.26479	3.75514	3.73236	3.80146	4.59667	4.16949	3.83019	3.96704	3.0835	4.59991	5	3.88116
4.17584	4.2109	3.99081	4.35165	3.40251	3.50882	3.6308	4.3876	4.33376	3.21614	2.55723	1.6075	4.86968	4.74481	3.73824
3.57139	3.58499	4.34757	4.28892	4.39068	3.13798	3.64418	2.577	2.76775	3.65048	2.07584	1.63076	4.1468	3.77554	4.62887
5	4.52019	4.07175	3.96271	4.51507	4.22577	3.03736	5	3.38122	2.77379	2.89176	2.8812	3.31533	5	3.35889
4.2843	3.75462	3.41616	3.76186	3.85923	2.87801	4.38293	4.17717	4.63225	3.31726	3.41698	2.33802	3.89294	4.3962	4.20725
3.28522	4.17321	4.71794	3.79411	4.02294	4.34322	3.00131	3.5341	4.27206	1.99322	2.58386	2.08228	4.12644	3.69893	3.76949
4.39393	5	3.90488	3.76356	3.13085	3.09845	3.36293	4.09428	4.01168	2.04896	3.495	3.02304	2.99854	5	3.54272
3.41519	4.04236	3.98362	4.69364	3.82019	3.2733	2.85465	4.10571	4.43891	1	3.3581	1.97492	4.9332	5	5
4.47225	4.78956	3.44004	4.31549	3.96988	2.77325	4.04836	3.59989	5	3.3303	1.84653	2.25986	4.18543	4.18018	4.25143
4.69516	3.67809	3.73403	1.84173	5	3.44902	4.00981	4.11875	3.96737	3.57823	2.12835	3.37946	4.32881	3.89781	4.36796
3.50759	4.07901	3.46912	4.35913	3.33282	4.48272	3.90398	3.63552	4.14162	2.11278	3.27028	3.4774	4.91932	4.09658	4.68267
4.57803	5	3.89623	4.03632	4.87851	4.16094	3.47445	3.75738	4.21556	2.32223	1	3.50068	3.72191	4.62884	3.14719
4.24767	3.72382	5	3.8869	4.59812	4.4849	3.39666	3.58823	5	1.9723	2.49538	2.20251	4.44443	4.96671	5
4.49324	5	3.17686	3.62804	4.16838	4.1655	4.37862	3.1404	2.84039	2.76786	1.59842	3.26149	4.03408	4.54229	2.49463
5	4.52465	3.03186	4.68688	5	3.02743	3.76967	4.0875	4.50993	3.28745	2.26641	1.73573	3.98955	4.26103	3.53874
3.85277	3.76252	4.8827	4.56327	4.22326	3.56845	4.28981	4.35118	4.03112	1.28006	2.39083	1.76517	3.63668	5	3.72458
3.54776	4.47944	3.87441	3.35899	4.2335	3.25386	3.56885	4.30893	4.44006	2.78661	2.34923	1	5	4.0123	4.34903
3.46629	4.68353	3.59856	4.18494	3.96813	4.7314	4.20864	4.49196	3.70558	2.30633	2.21342	3.57101	3.8747	4.81855	4.13123
3.51051	4.47309	4.62394	3.21984	4.73414	2.96225	4.88197	4.1946	4.07062	2.57938	1.832	1.79521	4.51968	4.02716	3.89991
3.95374	3.15787	3.63663	2.93427	4.65788	4.42559	4.4517	3.68036	4.52685	2.8213	4.20434	2.31143	2.975	4.45861	3.9928
4.20469	3.66372	5	3.4613	3.62459	4.42507	3.85255	4.5038	5	2.36826	3.90722	1.76277	4.80799	4.13186	3.41319
4.16601	3.95149	4.40676	4.50368	3.20845	5	4.25432	3.18549	4.58482	2.42749	1.78655	2.88662	4.73133	4.16649	3.10166
4.49631	4.05534	3.70725	4.56719	3.87821	3.51322	3.9556	3.4596	3.59116	2.35029	3.70748	2.13706	4.15846	3.97357	4.43591
4.0078	4.4724	5	4.25916	3.51998	4.29863	4.10473	3.42148	3.84574	3.17922	2.32037	1.48663	3.96383	5	4.41622
4.87212	4.20662	3.63657	4.40757	3.96189	5	3.90463	4.64803	3.82795	2.79313	2.69043	2.70916	4.34	3.76024	4.9507
3.84121	3.29879	4.44526	4.26132	4.74246	3.36765	4.0014	4.56567	3.02261	2.65441	2.55571	1.39639	5	3.75586	3.52599
5	4.32812	4.17958	3.45096	3.72562	2.72547	4.22726	4.29238	3.90195	1.61033	2.13818	1.81382	3.04206	5	4.41569
4.3754	4.46635	4.78104	4.20235	3.97431	2.48399	3.50398	4.64316	4.5397	2.23499	3.2887	1	4.56922	4.78671	3.82978
3.48571	4.43587	4.93691	4.46029	4.03481	4.2989	3.49047	3.47243	3.33546	3.12907	2.68812	1.40323	3.55303	2.76893	4.71428
3.35746	4.74847	4.0192	4.428	4.50906	2.48179	3.26687	4.20916	4.72909	2.52639	2.26641	2.52497	4.08805	3.86084	4.61318
4.28948	4.60035	3.54795	4.73224	2.65187	3.53938	3.13984	3.9249	4.39266	2.96167	1.68679	1.02482	3.95127	3.11281	4.12673
3.86592	4.37551	4.27598	4.39581	3.63598	4.10612	3.36963	4.50813	3.65946	3.73656	1.97448	1.3632	3.84301	3.62959	3.79628
4.4284	4.0579	3.59337	4.14601	4.12677	3.92962	4.19568	3.93087	4.01508	3.22702	1.45103	2.39834	4.09372	2.31689	4.57656
4.28394	3.10342	5	4.64911	4.72005	4.09781	3.56433	3.76903	5	2.56521	2.60856	2.01948	3.4195	4.11781	4.38814
3.9563	4.35777	4.08192	3.88144	3.70486	3.9556	4.40817	4.32455	4.54013	2.14231	1.76233	3.79443	4.71751	3.51483	3.58934
3.49192	4.22461	3.78081	3.28269	2.87407	4.69521	4.12083	4.5257	4.10527	1	2.41411	3.68373	3.02351	4.23594	3.20332
3.09109	4.26295	4.11081	3.78585	4.37183	3.13338	2.9189	3.59899	3.95739	2.38213	3.55907	1.79245	4.42386	3.22493	3.82688
3.73209	3.33395	3.19172	3.37857	3.61878	3.3261	4.49299	3.96335	4.14597	2.27179	3.43951	2.79	3.90408	4.24975	4.90925
4.51384	3.45137	3.41703	3.42738	3.2862	3.25914	4.58648	3.36494	3.79294	2.77326	2.57741	2.9245	3.39745	3.95105	4.68789
4.12846	4.73189	4.72025	3.79884	3.62539	4.38113	3.50368	2.50116	2.83715	2.39227	2.53904	1.98176	4.22143	5	3.3326
3.25256	4.07627	3.60586	3.34531	3.88928	4.43028	4.35211	4.12028	5	2.27573	3.91591	1.35312	3.16583	5	3.29935
4.10391	4.5089	3.37185	3.68443	3.63715	4.11586	3.5861	4.36534	4.19319	1.25442	2.96453	2.39139	4.12383	4.67121	4.76481
4.23119	4.11699	4.32199	2.57447	2.67666	4.62845	4.1586	4.15724	4.33889	1.84202	2.37054	2.27901	3.24627	4.00403	3.31862
3.46969	4.11785	4.71142	4.04931	4.53824	2.97537	3.3413	2.83026	4.06526	2.83366	1.60179	2.09496	4.37676	5	4.30558
4.09224	4.66297	4.43137	3.90084	4.76493	4.96706	3.02414	3.78949	3.65893	3.70114	2.87571	2.70962	3.54539	3.26818	3.63036
4.03493	3.79037	4.59763	3.32804	4.39091	4.86627	3.87031	2.66899	3.98845	2.43173	3.18053	1.87449	3.8294	3.35786	4.97023
3.31422	4.15767	3.54592	4.36147	3.31739	4.31494	4.02576	4.82182	3.14036	2.72947	2.15784	1.5936	4.27637	4.14973	3.53775
4.21467	3.82263	3.14691	4.5563	3.87911	5	3.86139	3.34837	5	3.16673	2.80384	2.47636	3.63647	5	4.68602
4.33647	3.8393	4.9008	2.77471	3.99609	2.64036	3.38958	4.75324	3.35929	1.93237	2.3455	2.67018	4.06522	4.0786	4.11092
4.64983	3.9145	3.80639	3.36609	4.35928	3.43289	3.86006	4.56752	3.48082	2.75677	2.47118	1.57635	3.1917	4.09005	4.15132
4.63228	4.23328	3.8495	3.3616	4.401	3.28529	4.26158	3.45965	3.83584	1.98166	1	3.04966	4.47853	3.33485	2.81781
3.1734	3.81275	4.79692	3.24207	3.5595	4.30504	4.07306	3.32033	4.87285	3.10538	2.44475	1.16066	5	4.76756	2.67825
3.4373	4.85345	4.33374	4.48063	4.0492	3.0649	4.2095	4.21022	4.10871	2.60598	3.27856	1.99532	5	4.77191	3.86766
4.30902	3.56324	4.27353	3.76432	4.27437	4.33025	3.69793	3.49341	3.35832	2.70892	2.15802	2.21939	4.1547	4.67345	4.14814
4.30827	3.98788	5	3.71484	4.87349	4.75938	4.80303	4.06149	4.8526	1.95218	2.63677	1.95464	4.57292	3.82247	3.32488
4.30903	3.83616	3.61389	2.4973	4.4227	4.28664	3.3943	3.7103	4.5386	2.99492	2.07083	2.00446	3.03162	3.77598	3.34678
5	4.96819	4.5567	4.34479	4.47343	3.99863	4.39254	2.9313	4.42306	3.9593	2.85231	3.70975	5	3.42413	4.33688
4.34253	4.21793	4.03421	3.03252	4.0503	3.10849	4.80913	2.66172	4.52944	1.79446	2.44843	1.80438	4.56574	4.25032	4.33771
4.68134	4.71911	4.16116	3.94195	4.84628	3.2072	4.38854	4.13601	5	2.26217	1.94253	4.10886	3.80964	3.55176	3.91736
4.5724	3.20866	4.91708	4.09416	4.24586	4.67473	3.97849	3.66307	5	2.66213	3.53279	2.70599	4.84231	3.49355	4.46812
4.39083	4.26023	4.3047	4.85246	3.48335	4.34554	3.78302	3.66815	3.68797	3.05048	3.25025	2.46444	3.94731	3.94579	3.29548
3.81084	4.63378	4.32298	2.98383	4.84202	3.77269	4.72165	4.41752	5	2.10832	2.17657	2.73337	3.82518	3.90651	3.78644
4.45538	4.14937	4.6435	1.78634	4.41874	3.50746	3.24622	4.70407	4.3299	1	2.94845	4.17095	4.3852	3.87721	4.98873
3.5363	4.73929	3.78103	4.02869	3.73417	2.38193	3.51793	3.83647	4.39946	3.45143	2.97619	1.70448	3.46199	4.47987	4.04099
3.85791	3.78963	3.49647	5	3.7123	3.0504	3.86147	3.79564	3.08464	3.03235	3.04961	1.61571	4.71297	4.24743	4.07579
3.70878	4.94561	3.37311	4.76726	4.17795	5	4.84259	4.30009	3.99777	1.27994	1.41402	1.87159	3.46641	4.02711	5
4.04912	5	2.82019	4.04676	4.27791	2.90368	4.32786	3.18584	3.61231	2.0747	3.30462	2.4225	3.46997	4.30981	3.16039
5	3.8823	5	3.55585	4.11838	3.93264	3.51917	4.13389	4.59684	3.59773	2.20121	1.19196	3.55419	3.60508	4.47786
2.87964	3.8327	3.33807	4.46499	4.18679	4.50521	3.91382	4.33113	4.74265	3.51346	2.34952	2.41564	4.5557	4.26317	4.99839
4.41176	4.97203	3.86725	3.21852	5	2.92155	3.73141	4.40814	2.85531	3.15705	4.44652	3.58548	3.72993	4.29036	3.80509
3.03237	5	3.83391	4.23345	4.64293	3.9293	3.67413	2.83795	4.08678	2.37672	2.81131	2.50599	3.2912	3.29817	4.51578
3.71684	3.78628	4.18444	4.25383	4.11438	4.45654	4.68733	3.54319	4.77312	2.55809	2.32957	2.19512	3.73659	4.79742	3.41079
4.65337	3.84789	4.48944	4.64215	4.56479	3.80875	3.27695	3.47304	3.98799	2.40835	1.05629	1.96729	4.08077	3.67114	3.58796
4.03857	3.93093	4.51628	5	3.38049	5	5	4.05993	4.53744	3.28977	3.57283	3.02896	3.39142	4.25419	4.23098
3.35335	3.29333	3.65015	4.17469	4.23876	2.63198	4.59694	4.28845	4.3107	1.88691	1.65835	1.82192	3.40899	4.89865	4.47914
3.57082	3.54881	3.89973	3.54373	5	4.54111	4.75452	4.89803	4.305	1.93594	1.89759	3.69248	5	4.75541	4.67256
4.40776	3.49752	4.16955	3.8821	3.86917	3.67904	3.82224	3.70302	3.93721	3.20719	2.36805	3.75335	3.58366	4.2206	4.94178
3.56178	3.63932	3.85079	2.66165	3.49142	4.34034	4.01004	3.70146	3.37005	2.46895	3.59149	2.57973	3.90617	3.9825	3.95953
4.12988	4.07919	4.96441	3.4137	3.60875	4.10892	3.24011	4.6898	3.42708	3.46493	3.14127	2.39194	3.87966	4.76851	4.71617
4.02734	4.24053	4.29458	3.6135	3.34622	3.28679	3.7852	4.17795	4.52561	2.02994	2.48951	3.12146	3.84719	4.60482	3.79462
3.60904	5	4.44093	3.53314	3.52914	3.9603	4.39619	4.76059	4.11167	2.46166	2.8158	3.16636	4.47281	3.82898	4.54125
5	3.50099	4.39773	4.00665	3.7777	2.49947	4.87764	4.17324	4.01689	1.85431	2.17973	1.83581	4.66889	3.72306	4.12449
4.38035	4.69059	4.70408	3.32431	3.15666	4.22227	3.43571	3.30573	3.84567	2.50515	2.69776	2.03141	3.91643	2.95659	4.26741
2.78491	3.97161	4.10861	4.68472	4.00937	4.00871	3.8807	3.20012	3.91689	1.46502	2.65134	1.47436	3.35811	4.29242	4.2541
4.11187	4.07032	3.2219	3.90014	4.54137	4.24706	4.00922	3.06909	4.72815	2.15866	3.27814	2.68635	4.86466	4.15038	3.03718
3.60293	4.50489	4.23981	3.89349	3.45535	4.54068	3.26253	4.39723	3.89885	1.49462	3.27702	2.86664	4.0428	4.88171	3.32553
4.51146	3.42637	3.60919	3.67047	4.91157	4.05733	4.45481	4.71316	3.29536	2.98575	2.94578	1.45505	5	4.41543	4.06152
3.52449	4.32945	3.68283	4.00863	4.30648	3.90366	3.66561	5	4.54619	3.00161	2.34636	2.08136	2.75265	5	2.98763
3.93116	4.19987	4.35182	4.47757	4.61835	3.18325	3.98277	4.50586	3.97707	1.28882	3.11928	1.45692	4.21724	3.78158	4.49873
4.30299	4.39547	4.74297	3.29301	3.6053	3.30145	3.82883	4.6977	4.11884	3.43372	2.53562	1.77084	5	4.88289	4.52293
4.51945	4.2735	4.01276	3.43932	4.51272	4.63071	3.6264	3.65199	5	4.24819	1.84266	2.78571	3.88804	3.88265	4.1963
3.27982	5	4.1853	3.68739	3.34484	4.80543	4.09577	3.30615	4.08766	2.5322	2.3177	1.88656	3.9647	4.66656	3.32732
3.7993	3.71736	5	2.95789	4.53415	3.63332	3.97063	4.51005	4.27351	2.05122	2.65917	2.18942	4.27731	3.32474	4.82808
3.71503	3.7814	4.14445	3.32652	4.1031	3.8322	3.87689	4.25061	3.39265	4.47703	3.23715	1.26088	3.76472	4.34108	5
3.608	3.72612	5	3.56665	4.33195	3.16677	3.66292	4.06447	3.9682	1.57672	2.47153	2.53089	3.91276	3.00919	4.08825
5	3.76671	4.33931	4.51207	3.29464	4.62093	4.29171	4.23242	4.46572	2.51407	1.75356	2.36901	3.89731	4.03972	4.30632
4.24299	3.71757	2.94354	4.08379	3.46296	4.26579	5	4.19391	3.16678	2.62574	2.63972	1.88973	3.72355	4.46421	4.12104
3.24347	4.81341	4.452	4.03551	4.35834	5	4.18393	4.77029	4.22051	3.4416	2.67942	2.26769	4.83731	3.88742	4.31822
4.55072	4.9523	4.2287	4.49563	3.43099	3.18517	4.69767	4.77699	4.16047	2.75182	2.73009	2.52621	4.37665	3.56974	3.92826
5	3.75755	4.77385	3.80384	4.27792	3.53539	3.26587	4.32653	4.12477	2.15096	3.24391	1.82959	4.25038	4.70767	3.97926
4.61948	3.60059	4.40391	4.17333	3.17972	3.96201	4.19466	4.50748	4.7223	1.83417	3.31325	1.36662	4.58514	4.13792	4.54343
3.08838	4.38285	3.91693	3.82774	4.5089	4.25254	3.44158	4.30844	4.30066	2.26072	2.18405	3.6639	3.94139	3.90626	5
3.70946	3.76867	3.26542	4.08575	3.26049	3.64903	3.21385	3.7233	4.98684	1.79515	2.1687	1.95671	3.63548	4.22514	3.15996
4.76015	4.47976	3.87459	3.49207	4.33138	3.18893	3.65638	4.45394	3.50385	2.53348	1.87186	2.33227	3.73843	5	3.93771
3.5754	4.22175	3.48969	2.19283	4.37538	4.41699	4.81514	3.1633	4.18155	2.10506	3.08917	3.10759	4.10107	4.8921	3.29172
4.26629	3.19055	3.65169	3.806	3.58194	4.30479	4.67001	4.63233	4.15068	1.45417	3.61417	4.87034	3.46447	4.89754	4.95521
4.46478	5	4.35315	4.89592	4.34922	3.15861	4.2458	3.28329	3.45845	3.3786	2.37944	1.52886	3.79984	4.46133	3.64736
3.44384	5	5	4.54835	4.15627	4.74881	3.18038	4.17148	4.67378	2.15163	2.431	2.71488	3.79033	4.29989	3.13408
3.96428	3.73233	4.2368	4.57578	3.67669	4.61914	3.98223	3.49291	5	1.6123	3.62675	1.90471	5	2.76235	4.38291
2.05524	3.86738	3.28247	4.76529	3.39487	3.89401	4.28102	4.33203	4.0898	2.38222	2.95389	2.02285	2.43571	3.79261	5
3.38537	4.27152	4.26676	3.96206	2.82242	3.85572	4.20532	3.97964	4.40301	2.54786	2.90536	1.89585	3.99223	3.91166	4.39816
3.84846	4.30067	4.71798	4.03812	4.20979	4.18784	2.99372	3.04315	4.15071	1.27747	1.76636	1.61204	5	3.07506	4.12288
3.25133	4.49513	3.63413	3.46764	3.06112	3.19681	3.56581	4.25242	3.67185	2.73215	3.07511	2.3711	4.17311	3.50555	4.24548
4.97945	5	3.91959	3.67875	4.05721	3.82102	4.06155	3.65325	3.00754	1.76699	1.9496	1.36785	4.55205	3.0115	4.8489
3.14192	3.99383	4.00881	4.33104	3.84193	2.29333	4.42177	4.52869	3.67654	3.69772	1.80619	3.06277	4.1599	4.17701	3.47548
3.73597	3.62102	3.52906	4.74272	4.40749	4.41352	2.78232	4.0008	3.26482	2.86677	2.35726	2.4385	3.6996	4.69126	3.93289
4.07844	3.27241	4.38897	3.80239	3.81877	2.70695	4.00273	4.23725	5	2.22007	2.18995	2.6957	2.75485	4.86406	3.72839
4.86476	3.66144	3.92743	3.58487	3.80233	4.85239	4.18583	3.42546	4.03093	1.97838	2.44488	2.07367	4.22327	4.44887	3.29928
3.13848	4.08012	4.25172	3.90037	4.43912	3.56892	4.60977	3.6464	3.89245	2.42652	1.59131	2.14296	3.63464	3.62196	3.80297
4.6979	5	3.4675	4.32084	4.20103	3.65183	4.51571	3.72482	4.63349	2.92895	3.27117	2.60129	3.6198	3.04076	4.66463
4.00614	3.78943	3.73753	2.8893	4.18969	3.36059	4.44954	4.51402	3.42695	2.48215	3.38938	1.58516	3.80061	3.14588	4.33996
3.41109	4.23427	4.43343	2.29267	4.28156	3.59837	3.62004	5	3.63988	2.34799	1.23686	2.14941	5	3.43861	4.38659
4.27726	4.09015	3.7763	3.51462	3.07866	4.79297	2.9552	3.5169	4.14084	2.54086	3.28492	1.79827	5	3.66668	4.08789
4.11944	4.81304	5	3.0455	4.45407	2.05853	3.86417	4.64611	4.71726	2.0773	2.03263	1.7766	4.23032	4.10415	4.31399
3.63987	5	3.76022	3.5443	4.36748	4.69388	4.70098	2.69819	4.40101	2.25976	3.19988	1	3.82114	3.5915	3.51965
4.04188	3.78148	4.13481	3.79655	3.38999	4.03662	4.93607	3.28349	4.249	1.03995	2.55209	3.33753	3.39366	4.40339	3.81429
3.76881	3.80634	4.55955	3.58273	3.85355	2.95508	4.52633	3.42473	4.14687	3.18161	2.62014	1.91942	4.38112	4.06064	4.1152
4.06811	4.7265	3.14898	4.91673	3.97642	3.04728	4.3576	3.18849	4.34014	2.70916	2.47043	3.21436	5	4.20633	4.16651
4.39728	4.50913	2.94351	4.12872	3.9193	4.97348	4.32778	3.04985	4.22099	1.95858	3.44849	3.14815	3.9516	4.88415	4.19211
4.95161	5	3.08461	4.11033	4.20032	3.13815	3.76633	4.2478	3.48202	3.82911	1.73229	1.4998	2.6726	3.49186	3.917
3.25731	4.45036	4.75755	4.33555	4.85882	2.99265	4.02196	3.87156	4.12765	2.56091	3.02549	1.63811	4.50203	4.45122	3.77355
5	3.88442	3.66889	3.10282	4.64906	4.59612	5	4.22764	3.45579	1.7747	3.37093	4.19235	4.69124	4.19162	5
2.82875	4.45439	5	4.62738	3.21267	4.03699	3.53447	4.41428	4.14865	3.09972	3.10144	3.62565	3.14849	3.99991	4.54407
3.90893	4.76522	3.66145	3.84696	4.37324	3.14345	5	4.15937	3.81161	2.77863	4.22729	2.37794	4.20589	4.73115	4.24789
4.35299	4.59229	4.11073	4.36934	4.79736	3.95164	3.90678	4.39466	5	2.77621	2.22974	2.58016	4.37074	4.72741	3.86007
4.1686	4.40436	4.92527	3.1497	4.23209	3.08197	4.89526	3.95828	4.07606	2.20197	3.27011	1.95841	4.05614	3.63211	3.72927
3.62638	4.74	5	2.81237	4.65459	4.57057	3.25591	3.2878	3.25746	2.81535	2.52574	2.70265	3.62554	4.0907	3.92152
3.87513	4.80158	5	4.47252	5	4.54296	4.45154	4.63469	4.01949	2.31677	3.46338	1.89797	4.70956	4.36873	4.1757
3.7042	4.9293	4.72502	4.16349	4.61423	4.1724	3.65794	3.64653	4.41162	2.88916	2.59462	1	3.85797	4.0362	2.87174
3.64638	4.48923	4.61444	3.26856	4.14959	4.05316	3.25084	3.43864	5	1.16654	2.32849	1.47491	3.20889	4.55101	3.05837
4.50976	3.99973	4.35552	3.29124	4.62705	5	4.23112	3.89325	3.74633	2.19629	3.51425	2.41476	2.87032	4.36872	3.61787
4.21421	4.18803	4.46702	4.6878	4.08693	3.79978	4.70568	3.45231	3.15054	3.70551	2.25591	1.60825	4.85651	5	4.12428
3.58425	4.82391	3.66929	3.06741	4.01434	2.97269	3.59304	3.74954	4.5901	1.96305	1.61109	2.35291	4.47	3.28183	3.85644
4.53976	3.60984	3.50908	5	3.78915	4.11463	3.20059	4.20643	3.27164	2.07731	2.23821	1.64774	4.15278	4.12654	4.88687
4.18438	4.3212	3.99798	3.26957	4.93805	5	4.04489	4.20901	3.83831	2.18643	3.03332	1.85235	3.83584	3.6549	3.11056
4.48772	3.864	3.89789	4.34687	3.50894	3.08967	4.04754	3.4613	3.94543	1.64964	3.57443	2.99722	3.7826	4.56246	3.54919
4.37778	4.11725	3.72806	3.66997	4.91942	3.54698	4.42899	3.70738	4.05822	1	2.67779	2.57324	3.45456	3.2297	4.91206
3.5026	4.86707	4.41783	4.32223	4.29992	4.09151	4.66976	4.6446	4.5135	2.33859	3.52274	2.39323	3.84113	4.40779	4.07867
3.66389	4.21466	4.57318	3.51912	3.16042	3.76227	4.06435	4.29784	3.68982	2.5951	1.64928	3.01527	2.82795	3.82197	4.53091
4.44838	4.12786	4.05304	3.78604	4.22059	3.11239	5	5	3.93576	2.46325	2.28972	2.73643	3.65836	3.7595	5
4.36622	3.28409	4.88652	3.92864	2.73998	4.5853	4.23454	4.70808	4.09144	2.39859	2.398	3.41259	3.91344	3.3321	3.58372
3.98746	4.54775	3.31499	3.19847	4.3753	5	3.89214	4.68658	4.18976	2.53013	2.51981	2.0781	4.46593	3.92095	3.94041
4.0704	4.48729	3.8838	4.41858	4.53114	3.93729	3.13306	3.16728	4.1587	3.21599	2.65887	2.09926	4.07604	4.8507	3.83654
4.7666	5	3.56991	3.54075	3.64459	3.16715	3.9424	4.45832	4.3616	2.36669	3.08364	1.48922	4.57695	4.18489	2.82724
3.64506	3.91533	2.88008	3.73998	4.07413	2.71573	3.89817	3.96814	4.6063	2.09814	2.28864	2.09971	4.90948	4.57661	3.81376
4.32826	4.23149	3.95039	3.20396	5	3.98058	4.67618	3.66941	4.33558	2.30321	2.69732	3.07534	4.7349	5	4.52864
3.87868	4.24963	3.92695	2.10637	3.69655	4.57271	4.37749	4.10081	4.37215	2.90554	2.56841	3.30999	4.38231	4.35825	4.32435
3.86939	5	4.90807	3.76628	3.36466	4.13262	3.39238	4.56713	3.15067	3.48842	1.95188	3.07221	4.10712	3.86472	4.37145
4.65927	4.04282	4.37849	5	4.889	3.79832	4.20335	4.3005	4.13014	2.0603	2.52043	1.14407	3.51153	4.48035	3.77469
4.49525	4.26741	3.38549	4.44922	5	3.38751	4.50292	3.47292	4.3877	2.56925	2.49944	3.1582	4.54397	3.87342	3.60634
4.48811	4.46474	5	3.88652	4.00222	3.03549	5	4.44548	4.53736	2.73685	2.48444	1.11304	5	3.89735	4.76155
4.78329	4.21197	4.73262	3.71598	4.60688	4.38433	4.6325	3.61745	3.68459	1.8052	2.62223	3.02868	4.30526	3.28806	3.70161
4.0126	3.83214	4.34926	3.91573	4.80489	4.43964	4.55651	4.13001	3.70458	2.51429	2.65297	2.14255	5	4.75575	4.17645
4.40917	4.21645	3.86411	4.28298	3.55451	2.71799	4.13605	3.81799	3.75554	1.47403	2.29739	2.89177	3.18466	3.9684	4.098
3.81384	4.74418	3.42434	3.07343	3.70882	4.91289	4.33299	3.86868	4.42185	1.26166	3.4909	1.46729	3.4075	4.30926	4.87703
4.1945	3.48409	3.77668	4.68003	4.73852	4.20185	4.8497	4.45975	4.72033	2.75672	1.78136	3.21982	4.61312	3.57842	4.58285
3.92191	4.17978	4.65325	4.40077	5	4.77972	3.30033	3.37588	3.85552	2.23129	2.09532	1.37452	4.25857	4.46157	3.22284
4.0582	3.67993	5	4.40273	4.33773	2.86051	3.89034	5	4.64478	2.6416	4.54597	1.93208	4.88827	3.74284	3.28747
4.35709	4.81703	4.92595	4.20693	3.47211	2.84392	3.63646	2.90735	4.17409	2.48747	1.87341	1.70133	4.09072	4.11497	4.34735
3.50907	3.18609	3.70669	3.91373	5	3.69572	4.32749	3.6414	4.02543	1.81652	1.65237	1.172	3.57921	4.7267	3.9614
5	3.76465	3.32823	4.371	3.68142	4.15195	4.83813	4.22213	3.97317	2.46832	3.11413	2.46617	3.97184	4.67446	3.7269
3.39639	4.32633	4.08453	4.31427	3.79892	5	3.74182	4.35059	4.54797	1.63683	1.14602	3.66426	3.18039	4.18678	4.60938
3.27149	5	2.93894	3.65217	4.2054	4.29426	2.66582	3.93971	4.29535	3.47368	2.43531	4.26683	3.42285	3.13912	4.11248
4.69487	4.06055	4.1939	3.49848	4.9325	3.63012	3.85267	3.96557	5	1.55082	4.10208	2.46801	4.68347	5	4.03147
4.475	3.76688	3.91144	3.9713	4.51239	3.08154	4.64808	4.24633	3.58867	2.36295	1.51854	3.18168	4.62367	5	4.4679
4.37447	5	3.72038	4.98431	4.24892	4.661	4.42258	3.86136	4.41086	1.77041	1.21262	2.56247	4.3178	4.6336	3.77493
4.37701	3.23119	3.04318	3.03263	4.27797	3.12471	4.35691	4.83591	3.78248	2.89929	1.55057	2.74922	3.06735	3.74808	4.94111
3.99265	2.78072	4.30816	2.87273	4.02611	4.93993	3.932	4.50361	3.57843	2.268	3.22885	2.1605	3.88496	4.13184	3.52717
3.46165	4.36401	3.68038	4.01533	4.33488	3.60093	3.33258	4.52369	4.09348	2.13693	3.38734	2.53655	3.365	3.87395	4.39416
4.04548	3.79877	3.29805	3.93562	2.48226	4.91341	4.40918	3.42031	4.18241	3.09724	2.24119	2.77624	4.80592	4.95831	4.8603
3.5937	3.48726	2.27664	4.02134	3.82204	4.27525	3.59943	3.95237	5	2.5206	3.07825	1.99508	3.74977	4.3575	3.17362
4.58507	4.52501	3.98349	4.07077	4.14479	3.7041	5	3.81972	3.98951	2.86165	3.57318	2.34575	3.44855	3.7295	3.794
3.91177	4.24628	5	3.74376	3.30939	3.43642	4.4423	3.39664	3.42189	1.81307	3.85114	2.3591	4.11788	3.91755	4.68532
3.5047	3.76155	4.99676	4.9429	4.23179	3.56136	3.75161	4.2161	4.26381	1.51663	2.42757	2.97848	3.71591	4.87271	4.69435
3.80717	3.33182	3.72574	2.77937	3.87732	4.09982	3.73317	3.67741	2.85522	2.57505	1	1.65378	4.99025	5	3.8971
4.24776	4.62347	3.63867	3.32005	5	3.85401	4.04423	4.39324	4.04483	2.27681	2.02538	2.36392	3.65911	5	3.5592
3.66177	4.49012	4.28126	3.82772	4.94381	3.38433	3.9563	3.35789	4.10962	2.9385	2.30124	3.7384	3.26046	4.65422	4.57356
3.50667	4.04049	3.40097	2.74977	3.72052	3.68406	4.7701	5	4.57676	2.44406	2.41874	3.21484	2.80825	4.04843	4.71013
4.14621	5	4.18108	3.7769	3.9095	3.855	4.21185	3.4622	4.68417	2.64355	2.4685	3.34443	4.08153	2.25509	3.3012
4.14698	3.45795	4.45965	5	3.95563	2.30989	3.66102	4.13158	3.79786	1.36363	3.38323	2.4171	3.76284	4.3783	3.27765
3.69583	3.18468	4.73616	3.91462	3.729	4.12072	5	4.47512	4.00963	3.82191	3.4921	2.6247	3.24266	4.1989	4.13515
3.71738	3.68486	3.93991	4.06149	4.11701	3.1142	4.12958	3.65762	3.64033	2.38503	2.47983	3.10157	4.81354	4.28399	4.37762
4.13923	4.07265	3.8778	3.01788	3.54503	2.99267	4.5613	4.51148	3.42316	2.98831	3.36894	3.49218	4.50035	4.23234	3.82056
3.13115	4.246	3.47321	3.46855	3.32163	2.61886	3.73506	3.26249	4.28594	1.91474	2.85036	1.03388	4.08307	3.40424	4.40758
3.15552	3.95526	3.50387	3.63736	4.37363	2.54428	4.31787	4.87127	3.33585	2.71561	2.64515	1.47919	4.9186	4.53445	3.57392
3.56893	4.31123	3.86411	3.6776	4.37772	2.85119	4.28667	4.00849	3.85122	1.58801	3.23458	3.31661	4.49752	4.57933	2.73118
3.87193	3.34908	4.22042	4.79715	3.51741	3.30369	2.96621	3.64215	3.5029	2.81645	2.65058	2.20618	3.60629	4.6094	3.74566
4.18654	4.96626	4.54815	4.29038	4.53721	5	5	3.82049	4.42981	2.25082	4.04047	1.9298	3.47647	4.76795	4.03794
4.88521	4.05071	3.51809	3.12198	3.62105	3.43188	4.87439	4.48535	5	2.52043	1.59311	1.52209	4.59079	4.56243	3.8345
4.5146	4.77038	4.89561	4.07255	4.1519	3.92443	3.86168	3.64933	3.31905	2.98858	2.23938	2.01149	4.33782	3.95398	3.30484
3.90404	4.30564	3.83733	4.24876	4.49221	4.08034	3.43864	3.55039	2.98819	1.63722	2.51144	1.41834	4.20185	4.1575	2.91061
3.98859	4.37405	3.98718	4.6981	3.97983	3.89175	4.30854	3.86708	4.02507	2.02086	2.90762	3.86377	3.5921	4.25467	3.69155
3.39848	4.44186	3.55167	5	4.27284	3.74579	4.15202	3.29382	4.10942	2.82013	3.48757	2.38429	4.46477	4.26462	4.53859
3.98889	4.36863	2.54546	3.18943	3.69014	2.96329	4.3134	5	4.2312	3.96876	2.58292	2.35943	3.6467	4.79893	4.75372
3.8268	4.48563	4.53043	3.3324	3.88212	4.81565	4.21495	3.66016	3.83221	2.40334	1.60444	2.81165	4.03881	4.5862	4.71263
4.19363	4.89749	4.44211	3.0197	3.87648	5	4.40374	4.49897	3.97962	2.9138	3.18976	3.07364	4.96817	5	3.51045
3.50366	4.21791	3.8312	3.73619	3.55205	2.62214	4.96838	4.12568	4.32051	2.42512	3.12847	3.06212	3.7035	5	3.30778
4.31161	4.5254	4.04019	4.22645	3.89394	3.08318	4.44086	3.40928	4.72426	3.85957	1.2407	3.15154	3.15621	4.24779	4.29798
4.91964	4.04616	4.30956	4.59113	3.07083	3.60413	3.47021	3.99643	2.92697	1.27694	2.59734	1.95841	3.46847	1.89801	4.38106
3.93474	4.96407	3.06247	3.84683	3.70531	3.12482	4.91754	4.4704	3.87864	2.56623	1.4869	2.19149	4.69658	4.9421	4.2401
4.24103	3.69416	3.68257	3.67611	3.82907	4.15418	5	3.88704	4.22829	1.36212	2.13474	2.93832	4.25284	3.87577	2.79156
4.41409	5	4.47656	4.00623	3.84629	3.29021	5	4.71587	3.54921	1	1.96803	2.03083	4.02267	3.71911	3.47987
3.75927	4.07591	3.24743	3.3154	3.8551	5	3.4259	4.61291	5	2.70822	3.16649	2.39643	3.79454	3.96093	3.98219
4.13446	3.24153	4.17613	5	3.96294	4.63338	4.24573	4.55135	3.71875	2.59765	2.68178	2.67913	4.39122	3.93201	4.29233
4.00756	4.17686	3.18605	2.77464	4.28766	3.9488	2.85074	3.72421	4.07522	2.30061	1.70009	2.94963	3.59054	4.56736	4.46038
4.05861	3.69137	4.27986	4.02932	4.52471	4.51889	4.43189	3.35209	4.43361	2.42566	3.21605	1.15562	4.2834	3.26434	4.08655
3.53619	4.60439	3.97862	5	3.61014	4.57413	3.77108	3.63185	3.74523	4.66881	1.59634	2.90032	3.66125	3.55337	4.19847
4.01471	3.70843	3.03092	3.90476	3.27808	3.40524	5	4.11774	2.99206	2.31928	2.83108	2.23639	3.5614	4.4059	4.05092
4.2988	3.83229	4.69884	3.76697	3.37477	3.22865	3.63523	4.32747	3.84281	2.85709	2.03019	2.89522	3.71751	4.57377	4.41137
4.87069	2.96628	3.55925	3.64979	3.70768	3.8547	3.08649	2.69706	4.71766	2.04544	2.34403	2.94385	3.87476	4.58492	4.18772
4.57556	3.82862	3.51385	3.77373	3.78885	4.40315	3.81724	3.99513	3.89786	2.70666	2.95299	3.52554	4.0707	3.72778	4.03944
5	2.64567	4.12034	4.86099	3.538	3.89734	2.91471	4.09485	3.59214	2.33324	2.96501	3.34742	4.24127	3.61304	3.83898
3.53959	3.14966	4.68918	2.3517	3.22233	2.6961	4.55066	3.83347	4.6554	2.21264	3.53588	3.3426	1.88698	3.89602	4.04877
4.52339	4.55625	3.39051	4.9734	3.72633	3.23802	2.86095	4.77476	3.90154	3.77323	2.54242	3.41057	3.61541	4.34392	4.29075
4.11001	4.57148	4.03701	2.90323	4.10886	3.74822	4.11707	4.25307	3.7939	3.32403	2.81452	2.60397	3.86506	5	4.16049
5	4.35527	4.25729	3.71334	4.35702	3.74703	2.85331	4.78612	4.18967	2.59572	2.29358	2.42253	5	2.97154	4.2285
3.51502	3.51981	4.41586	3.59953	3.66555	5	3.90782	3.87042	4.56245	1	2.72739	3.01097	3.452	4.06756	4.80563
3.49617	4.07137	4.10586	4.31199	3.7522	2.82981	5	4.56249	5	2.24729	2.90764	2.91246	4.19768	3.40039	4.1591
3.64036	4.09784	3.77978	2.78131	3.44398	4.15391	4.31639	4.98104	4.59634	4.39212	2.53118	2.18365	4.99702	3.20865	3.6106
2.72566	3.40498	3.50345	4.22352	3.98114	4.84238	3.5819	4.78702	4.7959	2.33854	1.33737	2.68338	3.31222	4.78017	4.53016
3.68455	5	4.05169	5	3.49094	5	4.08128	3.34472	3.79642	3.27225	2.83203	2.37543	4.33639	4.52677	3.18028
3.54452	4.62642	3.35672	2.94578	4.34388	3.51692	4.11081	3.84779	3.48448	3.50936	2.85519	1.80225	3.61864	4.46966	3.35115
4.09024	3.96742	2.24719	4.03279	2.92848	4.144	4.38358	3.7929	4.1374	2.65327	2.12388	3.30332	3.79722	4.75262	4.20151
4.20505	4.11613	4.26194	3.43661	3.78422	4.19883	3.27988	4.29355	4.1643	1.91072	1.70093	2.43864	3.61813	3.91217	4.30984
5	4.22503	4.54236	4.19812	4.18066	3.93684	4.45554	4.41181	3.45289	1	3.63312	3.8341	3.66089	3.94042	3.25297
4.57025	2.87496	2.58224	3.9134	4.1103	3.73081	2.47737	3.49666	3.99482	2.97891	2.94401	1.26216	5	5	3.77031
3.65386	3.95169	3.39416	3.45096	5	4.10518	3.72207	4.0407	4.33959	1.92967	2.43964	2.01025	4.60667	4.05206	3.63635
3.46095	3.69081	4.37149	4.24151	4.20988	2.02743	3.80704	2.78804	4.31624	2.62331	1.80408	2.42285	4.76104	4.64108	3.70799
4.29515	3.49903	5	5	3.39757	4.27745	4.48	4.86517	4.40257	1.62513	2.02473	3.19617	4.3952	4.20383	4.56616
3.20786	3.93134	4.01248	3.76637	3.94272	3.88832	4.11358	3.69258	4.27458	2.31433	3.51181	2.67963	3.13625	3.09104	4.4239
5	5	3.5632	4.40383	2.93425	3.64427	3.25666	4.03352	3.79579	2.5236	2.69636	2.61733	4.33697	2.97322	3.98853
4.70766	4.48451	3.89026	2.99471	3.95164	5	3.509	3.81421	3.79166	2.68802	2.21459	1.61092	4.74376	3.85261	3.67242
3.71849	3.75729	4.82493	3.23049	3.50017	3.32755	4.21921	4.68762	3.38063	1.71962	2.95678	1.59014	3.58796	4.83366	3.19021
2.97212	4.44355	3.61242	4.23068	4.54923	3.51785	4.05256	2.2975	5	3.33784	2.02992	2.62575	4.6792	4.67297	4.85211
4.81232	4.93961	3.52048	4.93888	3.67028	5	3.75253	3.99003	4.10807	2.08217	3.65059	1.44513	4.5226	4.74845	4.35527
3.93128	4.65478	3.71035	4.14893	3.92994	3.21756	3.8115	3.93651	3.96509	1.32787	3.54696	2.02769	5	3.60777	3.576
4.74269	4.13578	3.428	3.68086	3.61867	3.41492	4.5177	3.72782	3.54272	2.42368	2.2734	2.75064	3.84933	5	4.43176
3.04334	3.71184	4.0736	3.8995	5	3.69708	3.78938	5	5	2.52406	2.15993	1.71237	3.44143	3.62106	3.95787
3.64037	4.51893	4.97481	3.02471	3.80725	4.38851	4.04715	3.4676	3.456	2.61241	1	3.52375	3.88302	4.32769	3.82773
4.00315	4.33609	4.19385	4.32316	5	3.94546	5	4.46308	3.84269	3.45349	1.56289	3.25676	4.96134	4.19379	4.26113
4.02819	4.63712	3.84859	4.51763	4.48849	2.89516	3.24579	4.21375	4.3495	2.33449	1.66237	1.30001	3.00296	4.09568	3.5551
3.72996	4.4811	3.82491	3.58354	4.28924	3.42748	2.98889	4.75691	4.46013	2.41627	2.69463	1.74734	2.85897	5	3.79375
4.37371	4.72973	3.06209	3.57097	4.22124	3.37485	4.57015	3.59969	4.67476	1.72777	2.37164	1	4.15364	3.77693	4.07288
3.35943	3.77886	4.52987	4.08611	4.23628	3.74595	3.69281	3.56022	5	3.07439	1.65827	1.85219	3.83445	3.39024	3.70033
3.91457	4.89044	3.9533	3.5943	2.8434	4.09809	3.90906	4.65764	4.40369	2.62902	2.40319	2.93647	4.10464	4.212	4.40145
4.07218	4.21856	3.89171	3.85371	3.83267	4.09274	3.63131	4.25519	3.46638	2.20598	2.95374	2.11027	4.66719	3.9601	5
4.30866	5	5	5	4.50709	2.55679	3.94412	3.07304	3.94583	1.16673	2.96949	2.72256	3.76846	5	3.54742
4.42697	3.68649	4.17925	3.72708	3.97066	4.54476	5	3.67642	4.2847	3.51109	1.27023	1.33437	2.9762	4.6059	3.00092
3.32521	5	3.54893	3.64916	3.15689	3.9768	4.58128	4.23183	5	1.64062	2.51022	2.95858	5	3.9544	2.79896
3.07953	4.21875	3.74419	3.44672	3.96856	4.76917	4.61733	4.50266	3.26132	2.08611	1.63166	2.01142	3.50166	3.56633	3.90972
4.76661	3.70915	4.68907	4.42093	5	4.11094	3.25026	3.59246	4.82155	2.75084	3.23121	2.40852	3.46458	3.07183	3.6021
4.19939	3.80967	4.06796	3.77314	4.74814	4.57093	3.40931	2.25145	4.20795	1.66241	3.1489	2.33499	4.76223	3.58487	4.12472
3.55091	3.90779	3.13703	3.44544	3.9628	4.12658	2.39655	4.31393	4.6027	1.45454	1.97138	1.50992	3.86931	4.26897	4.07956
4.93069	4.3545	4.55154	4.82491	4.57087	4.74236	3.61437	3.26781	4.0388	1.01324	2.06377	1.59284	4.06197	5	3.03807
4.0694	4.4137	3.59911	4.89372	3.7801	4.16558	4.67402	2.7896	3.59454	3.0047	2.27711	3.07746	4.38967	4.87301	2.91107
4.70758	3.75578	5	3.4797	2.97768	3.73146	4.41017	2.3006	4.55052	2.11837	1.02304	2.67929	4.75015	4.33746	4.17756
4.04051	4.08539	4.64803	2.59342	3.44532	5	3.96709	4.48839	4.49266	4.54909	2.83518	3.13503	3.89992	4.0061	4.08126
5	5	3.73161	4.60526	4.93773	4.42233	4.08662	4.07717	4.68323	1.80395	2.40901	2.62726	5	4.36129	3.74451
5	5	4.76861	3.42076	3.8356	4.20162	3.68667	3.86461	4.09202	1.85498	3.27912	2.50009	2.81852	3.88882	3.00571
3.85062	4.36179	4.04071	4.45344	3.85397	2.90659	4.22286	4.83341	3.74011	2.10422	1.83111	1.19179	4.55587	5	4.28283
4.58294	4.1228	4.51166	2.52093	3.8201	2.89818	4.55953	4.38239	3.16473	2.67019	2.16661	2.21074	3.59628	4.08649	4.76314
4.38723	4.17202	4.29084	4.52482	5	4.0049	3.13047	4.96978	4.59162	2.17086	1.54543	2.38083	4.92336	4.1482	4.16679
4.82118	4.46811	3.49219	3.05218	4.97558	3.90186	4.27979	3.16436	4.35433	2.92863	1.897	3.76718	4.18523	2.87051	3.49152
3.42105	3.48632	3.61387	4.41153	5	3.37011	4.65946	3.97927	3.52053	1.81499	1.77261	2.88087	3.69626	4.08274	4.02673
4.41163	3.94557	4.61798	3.90999	3.90457	3.89869	3.85094	3.02997	3.77686	1.53289	3.29718	3.47524	4.4977	4.70189	3.18033
4.63505	3.09885	3.79913	3.23224	4.17737	4.91204	4.52042	3.86237	3.81994	1.24125	2.11122	2.81828	4.63591	3.55937	4.63478
2.94476	4.33953	3.75781	3.61507	3.09001	4.28678	5	3.85083	3.21021	1	2.68692	1.90209	4.48514	3.74957	4.04911
3.29004	4.48832	3.42693	4.38042	4.88616	3.00129	4.03739	4.37597	3.60939	2.13735	2.33347	2.48199	3.48218	4.67563	2.93911
2.77646	3.81009	4.25416	3.97413	3.29933	3.72194	4.33598	4.02734	3.4197	2.28931	1.71137	2.56536	3.80959	3.31401	3.8196
3.83836	5	5	4.30909	4.13007	3.23652	3.65717	4.37404	3.85251	2.05799	2.48219	1.74259	4.09756	4.83468	4.27798
4.43053	3.36454	3.35948	5	3.34162	3.52861	4.20875	4.42206	3.65678	3.37038	3.01937	2.13093	4.07524	3.88071	3.80017
4.90141	3.22138	4.01453	2.80503	3.64668	3.51047	4.37616	5	3.1238	3.35962	1.75457	2.25596	4.54985	3.96686	3.83446
4.04446	4.23467	4.84733	5	3.49764	3.46565	4.21691	3.81082	5	2.26564	3.16638	3.52393	2.89106	3.52567	3.26536
4.97717	4.72826	3.95222	3.97305	3.63527	2.92141	3.48818	3.43539	4.85152	1.24426	2.0052	1	4.3006	4.42683	4.33992
3.17194	5	4.27142	3.27085	3.67653	3.71064	4.22382	4.14765	3.63259	2.10331	2.26191	3.24407	3.92601	5	3.61092
2.97797	3.82467	3.36256	2.96878	3.67104	3.40757	4.97732	3.51863	4.26345	2.08013	2.97148	1.74424	3.5969	4.6689	2.70613
3.96667	4.74721	4.25698	3.76762	4.5	1.74939	4.36918	4.88918	4.35048	2.04001	2.13559	1.43954	3.65451	3.68143	3.77725
4.23044	4.07689	3.88771	4.54516	3.33708	5	4.67719	3.83007	4.81465	2.0116	2.6263	3.22596	3.97128	4.88137	4.58869
3.98038	3.99642	4.59144	3.81072	4.13232	4.56214	3.95779	3.66065	3.60884	2.04258	2.37972	2.91233	1.93935	4.00999	3.76784
2.75953	4.6302	4.71243	4.95781	4.73078	3.53659	4.54994	3.71721	4.75526	2.22942	2.69056	3.27816	3.67923	5	5
3.94653	4.49139	5	2.88418	3.69208	3.81317	4.26756	4.43105	3.77126	2.05512	1	2.96049	3.57451	4.68401	4.25738
3.21732	3.15416	4.34778	3.89154	3.56925	2.97984	3.52945	3.90535	3.29848	2.64583	1.31922	3.84189	4.41967	2.43412	4.20325
4.4018	4.98592	4.19548	3.02332	3.86169	4.98701	4.29111	3.615	4.53448	2.75226	3.03118	2.79111	3.61668	3.59755	3.92296
4.21996	4.92805	4.11663	4.15454	4.70784	5	3.50498	4.99921	4.87446	1.86255	3.32603	2.29047	3.97093	4.76663	3.95903
3.43607	3.72466	3.7881	4.52082	4.11646	3.90969	3.72027	3.4863	5	3.38975	1.96266	2.64005	5	4.29099	3.84195
3.69168	4.33748	4.20309	3.60547	3.68127	4.51647	4.2136	4.02134	3.38016	1.81396	2.42918	3.27043	4.69661	3.58575	3.81864
3.36447	4.39642	3.82276	2.07705	4.29033	3.9227	4.27835	4.39138	4.51935	1.36754	2.8063	1.85444	4.64136	3.81985	4.31852
3.96239	4.2564	4.10108	4.03926	3.33862	2.86429	3.38646	3.0212	3.85412	2.76654	3.08525	1.94368	3.80008	3.05626	3.4385
4.57309	3.76982	4.79056	4.20572	4.40882	3.51172	4.73239	4.28816	4.57002	1.92781	1.18063	2.18373	4.42582	4.14698	3.35446
3.40856	3.69703	3.39607	4.18301	4.24516	3.89235	4.4432	3.36694	3.21771	2.7249	1.97977	1	3.95966	5	3.32608
4.30243	4.08467	4.68393	4.76505	3.81531	3.48182	3.67716	4.49367	3.34234	1	2.36719	2.49665	3.98234	4.68296	5
3.68185	4.80364	4.79027	3.15026	3.49685	3.64694	3.17745	3.42241	3.63448	3.47472	3.0922	1.07971	4.34581	5	4.31821
3.52428	4.42616	3.92916	4.37615	3.46799	3.73602	4.01306	4.41566	4.14738	2.97061	4.3489	2.43714	3.7418	4.72944	4.1827
3.93578	3.87763	2.72689	4.73476	4.32089	3.74339	3.83243	4.6635	3.71535	1.44967	2.4404	3.0057	4.9958	4.81649	3.36549
3.37885	4.56302	3.63531	2.65499	4.73739	3.83658	4.16788	4.51686	4.49543	1.46486	1.61512	2.06619	4.00392	5	4.37401
3.66781	2.39087	4.7782	4.12376	3.61762	3.05758	3.88213	4.15079	4.71614	3.67059	2.88159	3.57398	4.47102	4.42636	3.93006
3.28127	4.78926	3.98628	3.54707	4.27503	3.29809	2.89553	3.86122	4.45975	1.98383	3.5247	1.37765	4.97336	4.08766	4.1285
5	3.05617	3.40042	3.84293	2.74778	2.90079	3.86699	3.65415	5	1.91607	2.67561	3.23388	4.71899	4.81959	3.41403
4.02116	3.88254	3.69714	4.14337	3.64923	4.48447	3.91663	4.88262	4.3495	1	1.96535	2.8726	3.25465	5	4.09616
3.58016	3.4282	4.50437	3.55894	3.98136	2.32605	4.4802	3.5803	3.36986	2.25446	3.2706	1.19878	4.36694	3.91202	3.7457
4.12839	3.32319	4.32804	3.427	3.45419	4.60751	3.68108	3.37776	4.91803	2.3406	3.06448	4.29756	4.61043	3.76706	3.54063
3.9326	4.7965	3.85664	3.92391	3.4381	4.77044	5	4.39922	3.73691	3.00085	1.88174	2.35538	4.63512	4.28331	4.44046
3.86742	3.81938	3.77991	3.13893	3.59933	3.58847	2.95302	3.52232	4.64625	1.52065	2.867	1.78576	3.43202	4.6989	3.07738
4.3685	4.3079	3.76495	3.13992	4.17532	1.9778	4.8867	3.42996	5	1.4358	3.29809	1.41504	3.70578	4.67885	4.33887
4.4545	4.07185	3.44655	4.37556	3.8876	3.54708	3.96541	3.13384	4.37401	2.81567	3.42732	2.24599	4.69673	3.3455	4.41069
3.6817	4.38622	4.96923	3.09584	2.65706	3.75507	4.61575	3.71025	3.2023	3.20471	2.55349	2.31082	3.64294	5	3.47221
3.65451	4.14609	3.80661	4.36642	2.72758	3.09258	4.14788	3.95037	3.54907	1.40019	2.34934	2.47185	3.92018	3.8153	3.5078
3.83497	3.3302	4.7303	4.22381	3.63588	3.43935	4.78373	4.14586	4.89365	3.25706	3.45909	2.19154	5	4.04096	3.86618
2.61885	4.69776	4.91279	2.69194	4.27461	4.87114	3.86758	4.57078	3.99853	2.52628	1.75289	2.84326	4.07132	3.65841	4.16922
3.09089	3.80375	4.59899	3.4257	2.3515	4.26545	3.44083	4.31614	4.14774	3.26426	2.90701	2.12866	3.66394	5	3.90829
4.82012	3.16605	3.74103	4.73588	3.70016	3.15281	4.9523	3.88548	4.55529	2.45085	1.64098	1.04553	3.57343	4.34524	4.26014
4.98698	3.84313	4.24224	3.21318	3.68425	2.68168	4.03191	3.88108	4.51779	1	3.34576	2.29545	4.29963	3.68941	5
3.85058	5	3.98548	3.57492	4.833	3.57109	4.23294	4.30609	4.26728	2.39362	2.41937	1	3.30011	4.71835	3.69537
4.34593	4.61013	3.45778	4.22344	3.76899	3.65058	4.84085	4.76354	3.9748	3.2421	3.48801	2.64764	3.9516	4.66148	2.97089
4.18675	3.89081	4.19462	4.44837	4.22979	4.14734	3.48083	4.07579	3.9124	1.87438	2.94399	1.71449	4.29994	4.08736	4.49555
5	3.89045	3.29258	3.72392	4.08475	3.42528	4.45729	3.71852	4.61474	2.22842	1.74375	2.51435	4.87949	4.70436	5
4.67174	3.90702	4.71261	3.48174	2.72166	4.15805	3.74606	3.40428	4.43214	2.37671	3.59724	3.31985	4.50053	3.70482	4.23566
3.92325	5	3.72123	4.89566	4.46092	5	4.0207	3.13288	3.94562	1	3.68587	1.73588	3.67156	3.90425	3.34735
3.42668	4.32916	4.1207	5	4.12924	4.37085	4.14337	4.39976	4.74927	3.66994	3.2176	3.14288	4.80705	2.99387	3.92566
3.03613	4.35802	4.16997	4.5852	4.30496	3.76634	3.19987	4.34679	4.02258	1.86904	2.06689	2.09663	3.92029	3.40563	3.32889
4.12208	4.71817	3.84466	3.95972	5	3.67179	3.6327	4.34642	3.589	2.85401	2.38579	3.62724	3.35858	5	4.38571
3.54619	4.24327	4.35202	3.33421	2.74953	3.55033	4.91064	3.9228	3.64462	2.43931	2.7018	2.14439	3.99678	5	3.18923
3.14665	3.94457	3.71506	3.31869	5	4.62645	4.63171	4.84416	3.51276	3.38033	2.1074	1.81165	4.9629	4.23947	3.81992
3.61206	3.98219	4.52278	4.26576	3.82753	3.36088	4.06242	3.70953	3.93655	2.78424	3.78464	2.88107	4.19914	5	3.3974
3.35107	4.05704	3.19241	4.19288	4.1724	3.83166	4.24587	4.57316	4.84023	2.33555	2.70103	2.09495	4.10751	4.10396	4.07609
5	4.07767	4.07583	4.88112	3.97269	3.83584	3.92345	3.97675	3.61694	1.87454	1	1.81099	5	4.05395	3.78019
4.52898	4.53658	5	4.35532	3.74546	3.44875	4.91395	3.63499	4.21309	3.0585	2.83755	2.06551	3.24119	4.23391	4.10606
3.99522	4.13117	3.3998	2.84784	3.6581	2.83927	3.97979	4.35552	3.70599	1.18859	2.35629	2.36878	3.32864	4.12505	4.01341
4.88797	4.53958	3.59335	4.63636	4.19771	4.02608	4.23911	4.24578	3.94381	2.95212	2.54755	3.33953	3.13049	4.07088	3.408
4.04642	4.05157	4.30834	3.20136	3.0897	3.7573	4.78762	4.21418	3.19398	1.73067	2.34197	1.04614	4.32359	4.88604	4.37613
3.48323	4.14718	4.10775	3.63122	4.45035	4.15017	3.63358	4.04877	3.96768	3.3766	3.16493	2.41616	4.1999	4.29008	3.97074
4.91387	2.90108	4.21038	4.07514	3.75028	3.42648	5	3.97726	3.98378	2.61291	3.38378	2.83743	5	4.62749	3.40688
4.32335	4.6498	4.29351	5	3.32196	4.65457	3.18172	5	4.42417	2.95089	2.79814	2.53541	4.24609	4.81883	5
3.37765	4.30789	4.38083	5	3.72999	3.18626	5	4.71055	4.23397	2.55739	2.36248	3.31691	3.85751	4.43291	4.28586
3.8858	4.69881	4.66582	4.32471	4.75429	4.99843	3.87639	4.4337	3.38096	1.27334	2.57106	2.34796	4.10108	3.61784	3.90804
3.47463	2.36225	4.24589	3.77176	3.6788	2.57665	3.95438	4.06708	4.75052	1.89749	2.61372	2.27081	4.17062	3.38828	4.84912
3.17032	5	3.85525	4.27415	4.21507	4.10434	2.96599	4.60429	4.22618	2.97067	2.0383	2.81463	3.09694	4.28927	5
4.55571	4.01625	4.40354	4.52136	3.56143	4.1328	3.82712	4.3108	4.21904	2.61666	3.00525	2.46952	5	4.09725	3.91279
5	4.76491	5	3.67553	4.45475	3.24311	3.47612	4.01572	4.09449	3.32669	2.92203	2.12671	4.41192	4.25243	4.20844
3.16086	3.47606	3.92042	5	4.4113	4.09708	3.73541	3.81786	3.78935	2.78229	3.67831	2.7613	4.226	4.19037	3.4072
4.33778	4.46766	3.41528	4.06105	5	4.69566	4.01761	3.95145	4.23068	1.82331	3.47874	1.94323	4.4691	5	3.91168
3.60961	3.46795	4.66425	4.24842	3.89466	2.24823	4.67467	2.09774	4.38535	1.94276	2.12003	1.97218	4.52565	3.40186	3.88056
3.70772	3.72574	3.92777	4.36615	4.40119	4.15192	4.22456	4.12636	3.05186	2.57204	3.17421	2.0304	4.01567	3.00603	4.1109
3.64456	5	2.6964	4.19511	4.05884	2.05471	4.28461	3.70691	3.77674	1	1.93433	3.34715	3.72126	4.39943	4.19966
3.48161	3.98559	4.50845	4.48726	4.77752	3.12403	3.44269	4.9556	3.94703	3.67141	3.08715	1	4.45967	3.97415	4.3359
4.02911	4.23046	3.6788	3.46792	3.5687	4.94042	3.57155	4.01161	4.2537	2.80922	2.23837	2.67692	4.33143	4.38964	4.14259
3.50143	4.62204	3.94568	3.50919	4.447	3.39275	5	3.28662	4.81599	3.35892	1.88372	2.42399	3.61407	4.55033	3.27355
4.16227	4.39741	4.19919	3.12989	3.88318	2.97828	3.65888	3.97007	3.63696	1.39358	2.79603	1.22339	4.95142	4.97046	3.43692
3.96986	4.19025	4.1143	4.20765	3.96149	3.66144	5	3.37233	3.80122	3.3712	1	2.61681	4.27601	3.29566	3.67216
3.85663	4.31898	4.42567	4.44526	4.05505	5	3.95416	4.28404	3.79248	4.06205	1.37432	2.73303	4.53789	3.86597	3.83066
3.45546	5	3.73871	4.22044	4.15134	2.51782	4.10137	4.17457	3.61908	1.57539	2.47576	2.81275	4.93515	4.45726	4.63046
3.65394	4.06543	4.30786	5	3.93026	3.06408	4.74222	4.5747	3.89169	3.03998	2.65771	1	4.11313	4.66228	3.30224
4.45323	4.22066	3.84427	3.89608	4.12883	4.8482	4.86314	3.52547	4.56248	2.50078	2.34148	3.35647	4.29017	5	3.78555
4.30055	4.73039	4.44329	4.36812	4.94687	5	4.03351	4.0204	3.4677	1.4189	1.49439	1.88358	4.58602	4.77342	4.57181
3.41347	4.76332	4.36922	3.13581	4.59127	3.7276	3.86705	3.18099	4.35669	2.84502	2.02748	2.8806	3.66508	4.16593	3.82007
4.0596	4.81222	3.43874	3.62903	4.52149	2.93266	4.06645	4.4209	3.07886	3.08352	2.87385	2.91875	4.13243	3.66574	4.27625
4.45083	4.48324	4.65159	4.38688	3.72668	5	4.30277	4.31132	3.7632	2.07921	3.00725	1.78631	4.17533	3.86143	3.91627
2.99836	3.4142	3.67842	4.49437	3.46646	4.91611	4.63478	4.29748	3.90231	3.31614	2.58864	2.86232	3.52636	3.84438	4.15407
4.32602	5	4.48483	3.69422	4.57318	4.27526	4.10254	4.00097	5	1.33327	3.40978	2.13015	5	4.59314	3.86292
3.60243	3.41219	4.22037	3.84988	4.52563	3.23132	4.47133	4.24886	3.93512	1.45367	2.87818	1	3.25562	4.3542	4.40024
4.34236	4.28158	5	2.83749	4.8836	3.76568	5	4.9626	2.77925	2.59562	2.07678	3.21742	3.32114	3.40581	3.07297
3.54204	3.64743	3.86592	3.65008	3.63761	3.68775	4.32879	3.82894	2.90067	2.51777	2.40365	1.85747	4.88854	3.93846	3.78201
2.91707	4.06152	3.79041	4.52327	3.86227	4.0316	4.28699	4.08319	4.12042	1.9984	1.61799	1.80185	4.52796	4.72653	4.17794
3.02347	4.29726	3.98835	4.30264	3.01631	4.8157	3.18865	3.34832	4.46826	3.06672	2.5243	2.11785	3.48442	4.411	4.32022
4.02885	4.29281	3.81809	4.25047	3.76452	4.41559	2.52156	3.47904	4.32527	2.87163	3.37847	2.59057	4.46437	4.54119	4.89577
4.15583	4.35315	4.47997	3.93484	4.59794	3.04584	4.33303	4.05869	4.20054	3.1007	3.0797	2.35991	4.98071	4.42975	3.76539
3.45741	5	3.03021	3.90494	3.7201	4.76355	4.04311	4.66236	4.79736	2.4138	3.58141	2.78365	4.08184	5	4.88769
4.38316	4.37212	3.36779	3.43778	4.38429	4.01919	3.79113	3.84623	3.77625	2.92181	2.38798	1.46236	5	4.34163	3.60459
3.00309	3.95351	3.35932	4.38918	3.8857	4.28095	4.24612	3.85845	4.63695	2.18804	3.54227	1.88033	3.06556	3.96839	4.79719
3.96035	4.67845	4.57018	4.19468	4.19443	4.82658	4.06376	3.75587	3.12079	3.93767	2.46469	2.3188	4.51629	3.65055	4.49048
3.27339	4.81368	5	4.24441	3.31139	3.02189	4.77667	3.67915	3.55703	1.93122	3.63011	3.72852	4.79992	4.34977	3.45192
3.6089	3.36344	3.93733	3.53178	4.05113	3.77492	4.15167	4.17698	3.01578	3.97371	2.5847	2.32033	4.63481	2.73558	4.18422
4.02844	4.45844	3.89871	2.39266	2.20532	3.42798	3.65185	3.10165	3.93509	2.52442	3.09506	3.15966	3.97739	4.08943	3.96926
3.48375	4.5207	4.04203	4.66801	3.88786	2.7025	4.6941	4.76856	4.07224	1.53714	3.63258	2.42699	3.92574	4.0765	4.37535
3.76927	3.92146	4.69713	3.56481	3.02172	4.0427	3.96972	3.60075	4.16846	3.45766	2.4646	2.06144	4.36649	3.38132	3.86604
4.60378	4.92542	3.44359	3.29606	4.7236	5	4.41592	4.43314	4.13713	2.58813	2.75287	2.22729	4.58945	3.64304	3.81565
3.65386	4.00997	4.14302	4.38544	4.46644	2.51195	3.81355	3.238	3.54347	3.09579	3.5022	2.28211	4.46148	4.68579	4.82146
4.50142	4.17535	4.58512	3.62559	4.28	3.7774	3.7101	4.4013	3.98586	3.3567	2.5069	2.82255	4.72403	4.33843	3.94077
3.32218	3.99616	4.30066	4.64196	4.9126	4.24838	4.1505	4.40317	3.20153	2.73657	1.67538	3.36223	3.48868	4.26107	4.49585
4.31788	4.10935	4.11375	4.3319	3.43065	3.88615	4.1077	4.23052	4.91794	2.08543	4.1001	2.65178	3.96334	4.38381	3.86479
4.86494	3.44223	4.60063	4.3785	5	3.72081	4.3879	3.40334	3.91782	3.183	2.27116	3.23095	3.53599	4.25558	5
2.51701	3.23597	2.37806	2.94383	4.55931	2.89055	3.93881	4.14973	3.80667	2.50053	2.71113	1.72465	3.86833	4.94572	3.593
3.52186	5	4.40673	4.74836	3.85807	3.96295	2.99818	3.29017	5	2.9801	3.4092	2.10976	4.70913	4.27406	3.63151
4.34624	3.59182	3.60755	4.08288	4.68137	3.27027	3.84034	3.84834	3.35465	1	2.17405	1.89299	4.16479	3.32507	4.91471
3.87817	3.50516	2.90162	3.64151	3.33622	2.26705	4.57629	4.61765	3.42465	2.81289	1.89449	2.62011	5	5	3.73303
4.22269	2.80797	4.30672	4.00037	3.50529	4.63621	3.92157	4.47802	3.44227	2.05299	2.77762	2.14873	4.21604	4.4222	4.96064
3.63761	3.71662	4.8242	2.65664	3.63485	4.47087	3.95217	4.00911	4.05928	3.65732	1.34485	2.91084	4.13582	3.84645	4.5351
4.05195	3.30615	3.91753	4.18606	3.68261	3.83616	4.69183	3.41512	4.35898	2.93616	2.39847	1.7483	4.16371	3.44796	3.90721
3.90659	5	4.57172	3.17944	3.36607	3.96035	3.67282	4.38735	4.54381	2.6679	2.77153	2.43012	3.71731	4.43755	2.91202
4.70067	4.70589	4.96737	2.95313	4.73385	4.55202	3.17432	4.01163	5	2.84042	2.41103	2.8808	4.0653	4.1297	3.98841
4.15265	3.68711	4.78895	2.83435	3.84469	3.95704	4.00362	2.60781	2.75034	1.80109	1.51958	1	4.77667	5	4.06098
4.20256	5	4.98398	4.67888	4.2115	4.43281	3.8095	4.46958	4.46524	3.63628	3.71592	3.88514	4.16838	3.99246	4.70033
3.75287	4.68906	4.44528	3.45952	3.65779	3.59176	3.52025	3.98546	3.76572	3.89396	2.67248	2.20179	3.62392	3.69757	4.95307
3.70744	3.9051	4.04526	4.97361	2.90764	4.71839	3.99477	4.72147	3.74815	2.77504	3.60181	1	3.54495	4.73748	3.58901
3.74047	2.60036	3.03882	3.52494	4.16203	4.02455	4.3949	3.34284	3.72814	3.61328	2.41797	2.51067	3.82988	4.75517	4.48071
4.23667	5	3.85236	2.70485	2.85265	3.93584	4.09443	2.09398	3.55474	2.1016	1.98399	2.42341	4.14432	4.30119	4.45924
3.74741	3.26626	3.49405	3.11843	3.95882	2.91096	4.28419	4.16745	5	1.94202	2.78843	2.34267	4.81615	4.60581	4.64405
4.17386	3.11276	5	4.76507	3.17901	4.00087	5	4.17494	4.60538	2.52865	2.44895	3.09383	3.29571	4.17739	4.29921
5	4.71354	3.89447	3.79087	5	3.21763	3.89427	2.9856	4.11392	2.80446	1.77557	2.92321	3.9081	4.34032	2.8345
4.52267	5	4.07392	3.5162	4.54682	3.3532	4.26701	3.4129	4.91061	2.22421	3.62885	2.60851	4.18659	4.89899	3.90675
3.80439	4.93056	4.33089	4.01201	4.06345	3.22924	3.79447	5	3.19248	2.87644	2.16441	2.71511	2.99978	4.57519	3.30658
4.72073	4.43835	4.02616	4.25125	4.75822	3.05364	3.59218	3.81663	3.30158	2.71447	1.31181	2.32695	3.59984	4.09844	3.87844
3.75515	4.45685	5	4.68218	3.49221	5	3.74906	4.43858	2.79322	1.80119	3.52972	3.64284	3.69207	5	4.588
2.77713	4.61205	3.62641	4.91395	4.32609	4.73194	3.81274	3.6096	3.68035	2.86316	2.24699	1.36456	3.62242	2.78109	4.18309
3.39515	4.55536	4.11676	3.64816	4.11989	5	4.31569	2.74582	4.19702	3.10447	2.17452	2.49776	4.21513	5	4.68885
2.87752	4.26871	3.55452	2.97177	4.15841	2.94397	5	3.89785	4.16172	2.62003	1.36423	2.44552	4.00366	3.17642	4.20505
3.78909	4.16252	3.20799	3.61057	4.76341	3.84988	3.67037	3.84064	4.18961	3.30685	3.81866	2.9693	3.76683	3.82374	3.221
4.01105	4.06244	3.63294	4.0822	4.4395	2.89454	3.85002	3.76007	3.25337	1.64782	1.69736	1.8093	4.35678	4.17545	2.48749
5	3.64762	3.97778	3.22537	4.17323	3.31301	4.06213	3.93122	4.58189	2.82757	2.64091	1.17943	5	4.11211	4.08929
4.19616	3.93159	3.74242	3.22999	3.00707	3.15731	4.33748	4.15856	4.24378	1.6808	3.23883	2.50978	5	4.80385	3.87164
3.86854	3.08423	3.58455	4.14065	3.42397	4.66771	4.25813	3.90993	4.53983	1.72014	2.8952	2.59686	2.94634	3.5653	3.41383
4.49764	4.041	3.15621	3.86594	3.92637	3.52264	4.87046	3.2416	2.96434	2.05835	2.55824	3.44272	4.44624	4.35646	2.97962
2.67332	3.50685	3.95014	3.92296	4.05602	4.54787	2.64416	4.29171	4.28689	1.84056	1.40883	1.51075	3.99319	3.85307	3.55915
4.14137	3.43785	3.09717	3.36905	3.32188	4.22288	2.66784	2.83038	3.38734	2.1164	2.03319	3.20829	4.19309	4.37708	3.88331
4.46252	4.20794	4.45603	3.73872	5	5	3.80247	2.76979	3.86161	2.35009	2.73146	4.05719	3.86103	4.16114	4.39953
3.11285	4.9352	4.04946	3.25304	4.90984	2.76439	4.75838	4.44351	4.42062	3.08601	2.04898	2.13556	4.17055	4.25576	4.11318
4.68625	4.65099	3.12547	4.52314	4.36127	4.68146	3.16061	4.30421	4.15466	2.27519	2.74235	1.49634	4.19084	3.87005	4.96484
4.2031	3.1577	3.81447	4.62467	4.04322	4.60251	2.29542	3.96556	3.58908	1.39006	3.07722	2.11512	3.75263	3.89396	3.37864
3.75083	3.50622	3.54871	2.60767	3.87267	3.11863	4.44271	3.16273	4.10376	3.29805	3.27375	2.4098	3.56218	4.37236	4.52864
4.37967	4.66446	4.1915	3.24934	3.42885	4.50499	4.24619	3.57525	3.18108	1.91404	1.74167	2.79465	3.83078	4.76623	4.02838
5	3.51051	4.80427	2.85243	4.04649	4.0353	3.44587	3.84235	4.79016	2.4589	4.13765	1.98602	4.24056	3.84103	4.4168
4.10912	3.96522	2.8749	3.44498	4.15465	3.64077	3.50868	3.04246	3.97683	2.81258	3.13724	3.48864	4.4594	3.67874	3.73809
4.14893	4.43003	4.06902	3.84159	3.25494	3.22325	3.51815	3.55658	4.77113	2.63973	2.5988	1.61983	4.61201	4.56808	4.64301
3.72438	3.51899	3.90392	2.88525	4.20051	3.29662	4.16632	4.3914	3.78408	3.26593	3.36268	1.18256	3.80349	4.1805	4.17713
3.49009	4.16323	4.4028	3.2547	3.90684	5	3.72421	4.85638	3.78585	2.8353	4.25579	3.1747	4.27031	4.6983	3.59233
4.4982	3.29958	4.12792	3.19723	2.85532	3.80048	4.39644	3.74834	3.64149	1.89708	1.5929	1	4.6775	3.65652	3.99279
3.48635	3.73918	3.54882	4.04509	3.48377	4.34749	2.38722	4.45389	4.6257	4.02499	2.44232	2.25711	4.79936	3.13234	3.85627
4.04294	4.29187	3.80857	3.94854	3.75184	3.24637	3.58589	2.85156	3.67434	2.63603	1	4.58238	4.0647	3.8802	4.29351
3.71341	3.1442	3.52238	3.39478	5	3.2541	3.42437	4.39567	4.48676	2.39686	2.73486	2.39157	3.96744	3.74019	3.29213
4.28739	4.36428	4.6456	4.02377	4.33393	4.55739	3.9462	3.51763	3.87053	3.17475	2.85578	1.61546	4.21467	4.15273	3.98239
4.2002	4.08822	4.01279	3.51732	3.19871	2.8553	3.77717	4.18441	2.91442	2.67462	2.57259	2.35982	3.41018	3.81789	4.23718
4.62252	4.43149	5	3.70984	4.29162	3.50935	4.57871	3.85135	3.75781	2.77946	2.14183	2.36444	3.98383	4.64461	4.01981
3.69399	4.23435	3.9636	5	3.07162	3.82382	2.9844	4.79225	3.39254	4.24453	1.16534	2.51245	4.54675	4.02711	4.80816
3.83808	4.91848	3.57496	4.83832	4.64961	3.87796	4.12729	3.47534	4.12034	2.30742	2.86147	2.86358	4.48517	4.29028	4.46441
3.41274	4.17513	3.09177	2.99029	3.71733	3.67463	4.435	4.37656	3.38576	2.27757	3.6188	1.67262	3.93784	4.29458	3.99551
3.73342	3.84236	2.91812	4.48081	3.94382	4.07707	5	3.8323	4.65559	2.5816	2.18629	3.58128	4.23063	4.31697	4.13001
4.22638	4.17338	3.04952	4.46798	4.79548	4.285	3.81094	3.90502	4.04535	3.25006	2.90804	2.57158	3.60521	4.18552	4.1774
4.45419	4.42598	4.16028	3.09622	3.2277	4.31425	4.29468	3.88969	3.99344	1.44543	1.5023	2.90876	4.5221	4.50636	4.24198
3.4467	4.12932	4.30524	4.47314	3.16173	3.10994	3.01768	3.4926	4.49354	1.12411	2.92005	1.9603	4.05331	3.72261	2.90461
4.52176	4.12436	3.05129	4.97655	3.64984	3.60109	2.66483	3.99154	4.67834	2.08902	2.32463	3.30047	3.93443	5	3.81908
